# Supplementary figures and images for: Efficient conversion of nitronate into nitrile oxide using cyanuric chloride. One-pot synthesis of bicyclic isoxazolines and isoxazoles from nitroalkenes
Source: Royal Society of Chemistry journal article supplement (doi:10.1039/b606717d), 2006-01-01

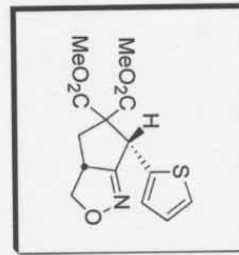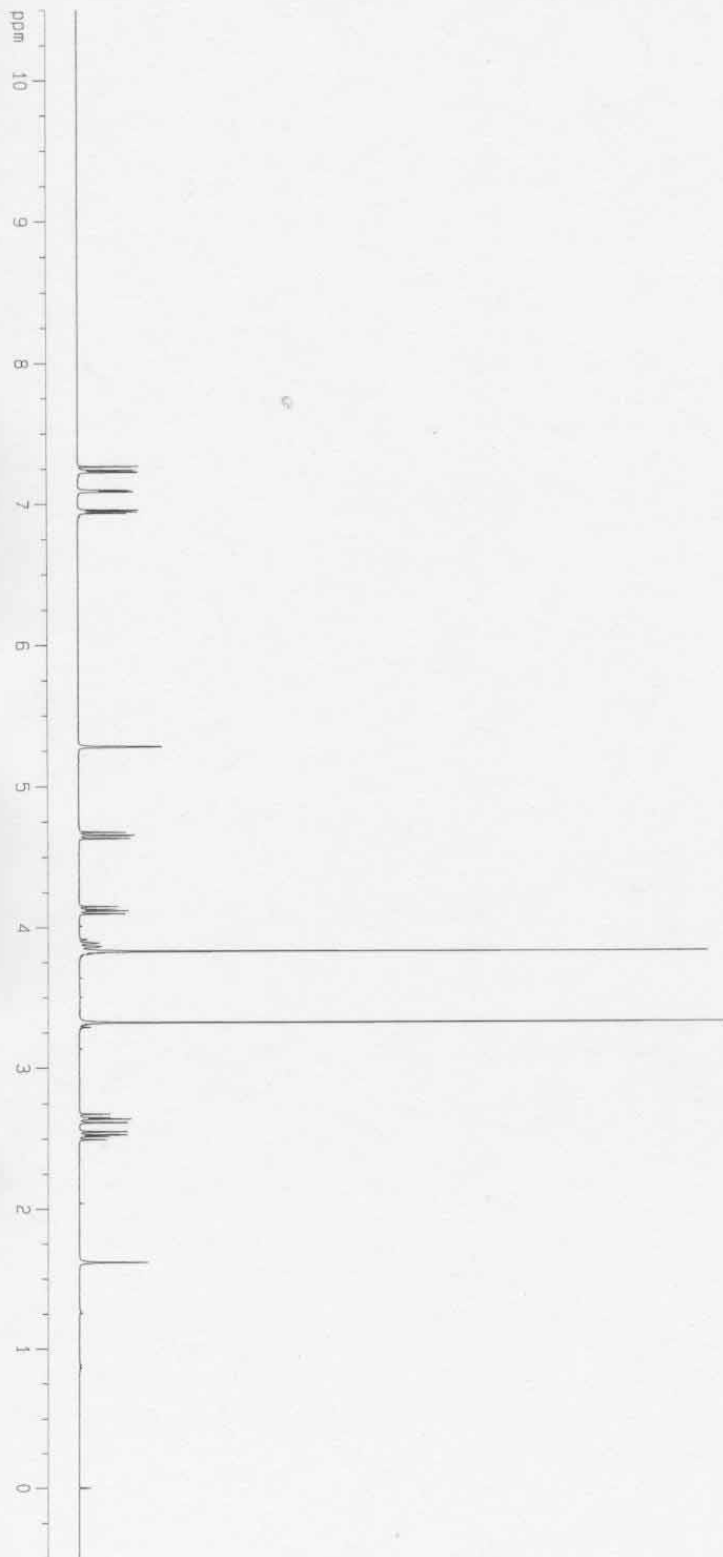

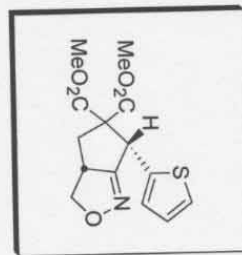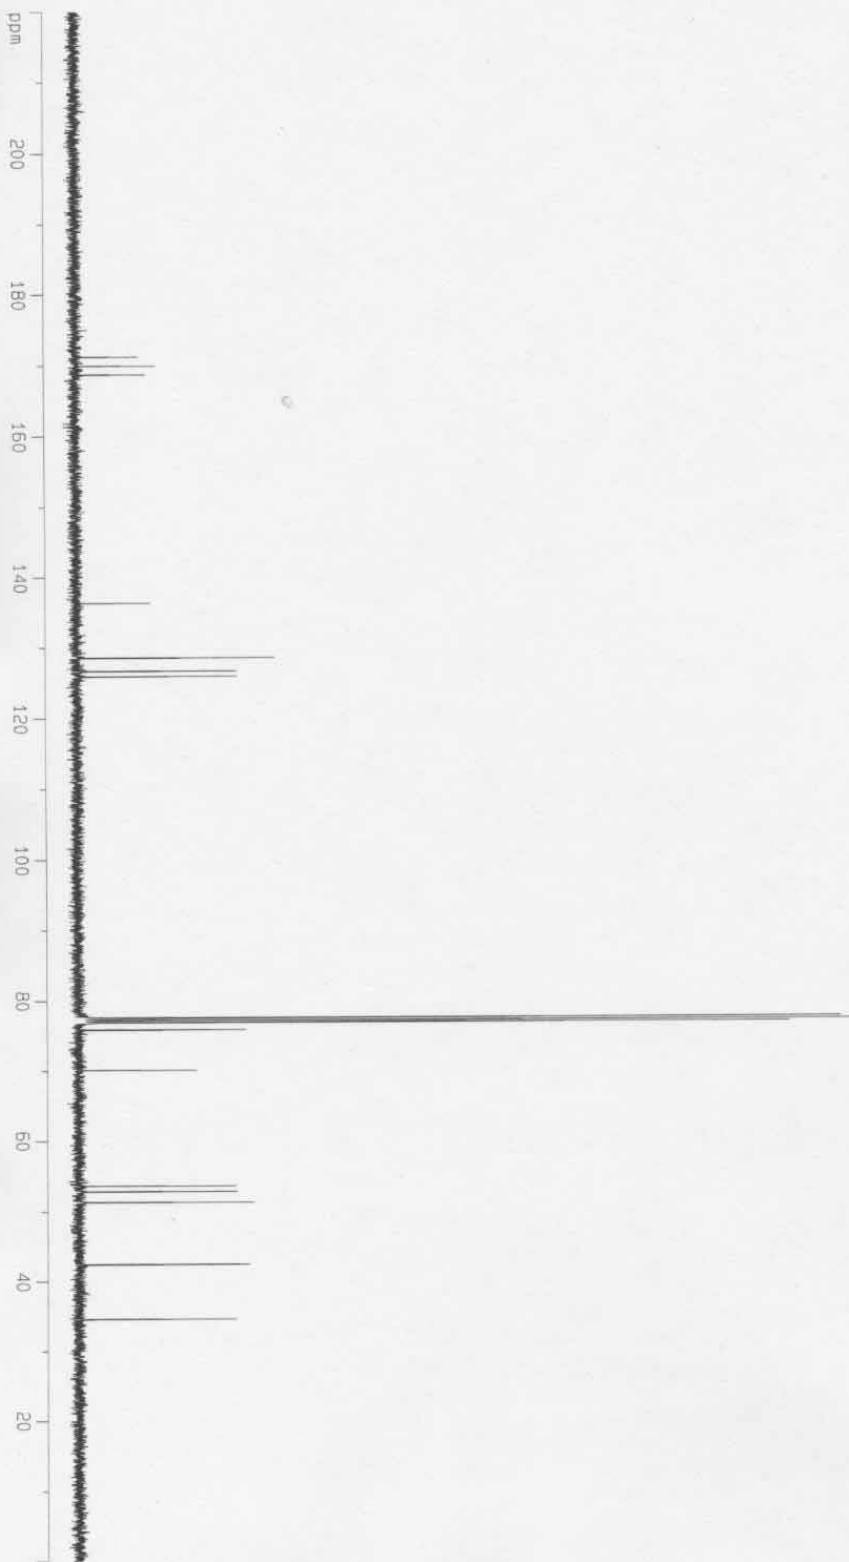

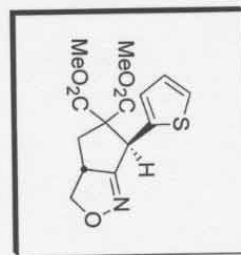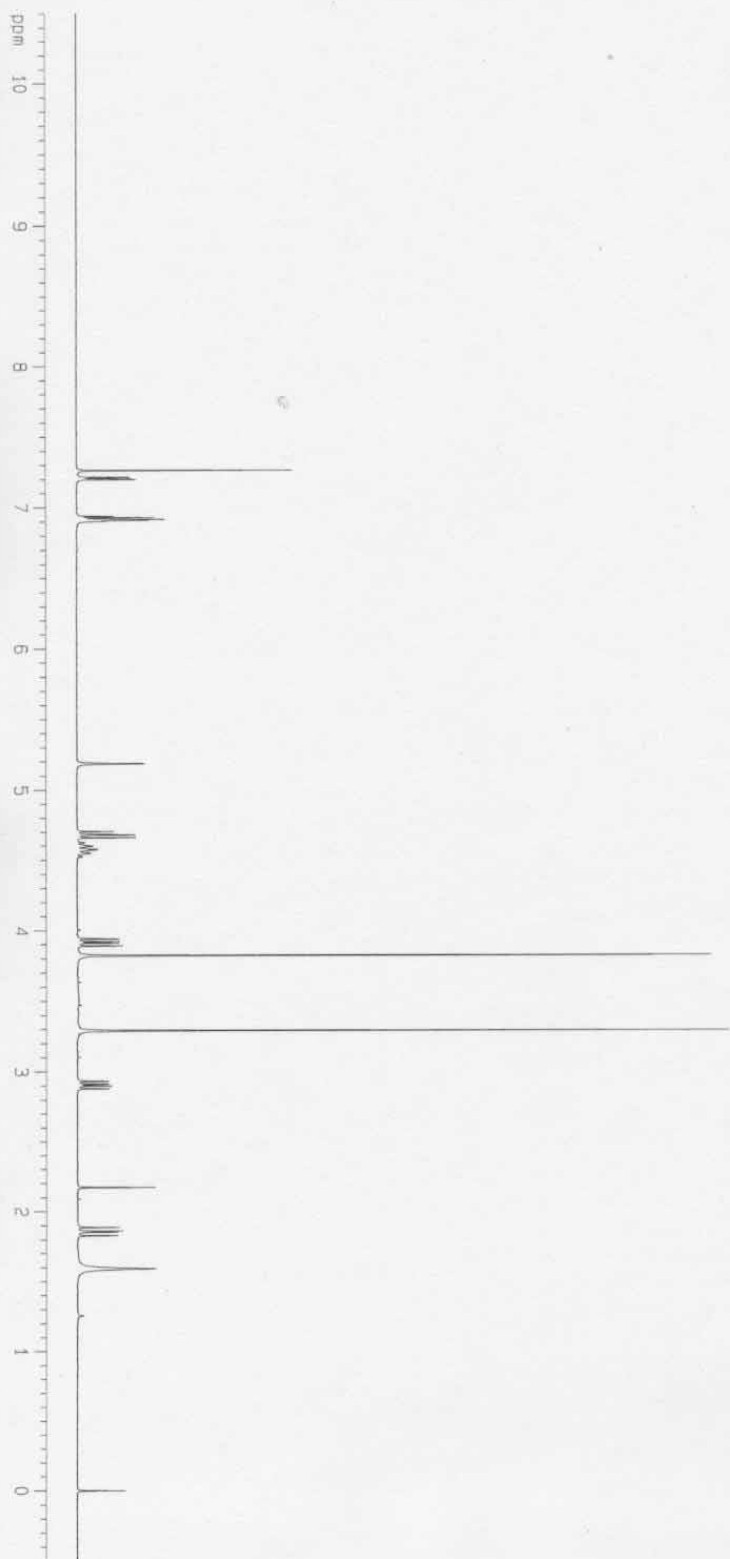

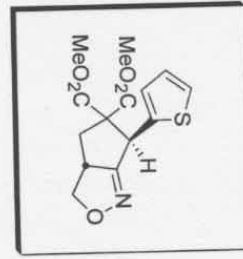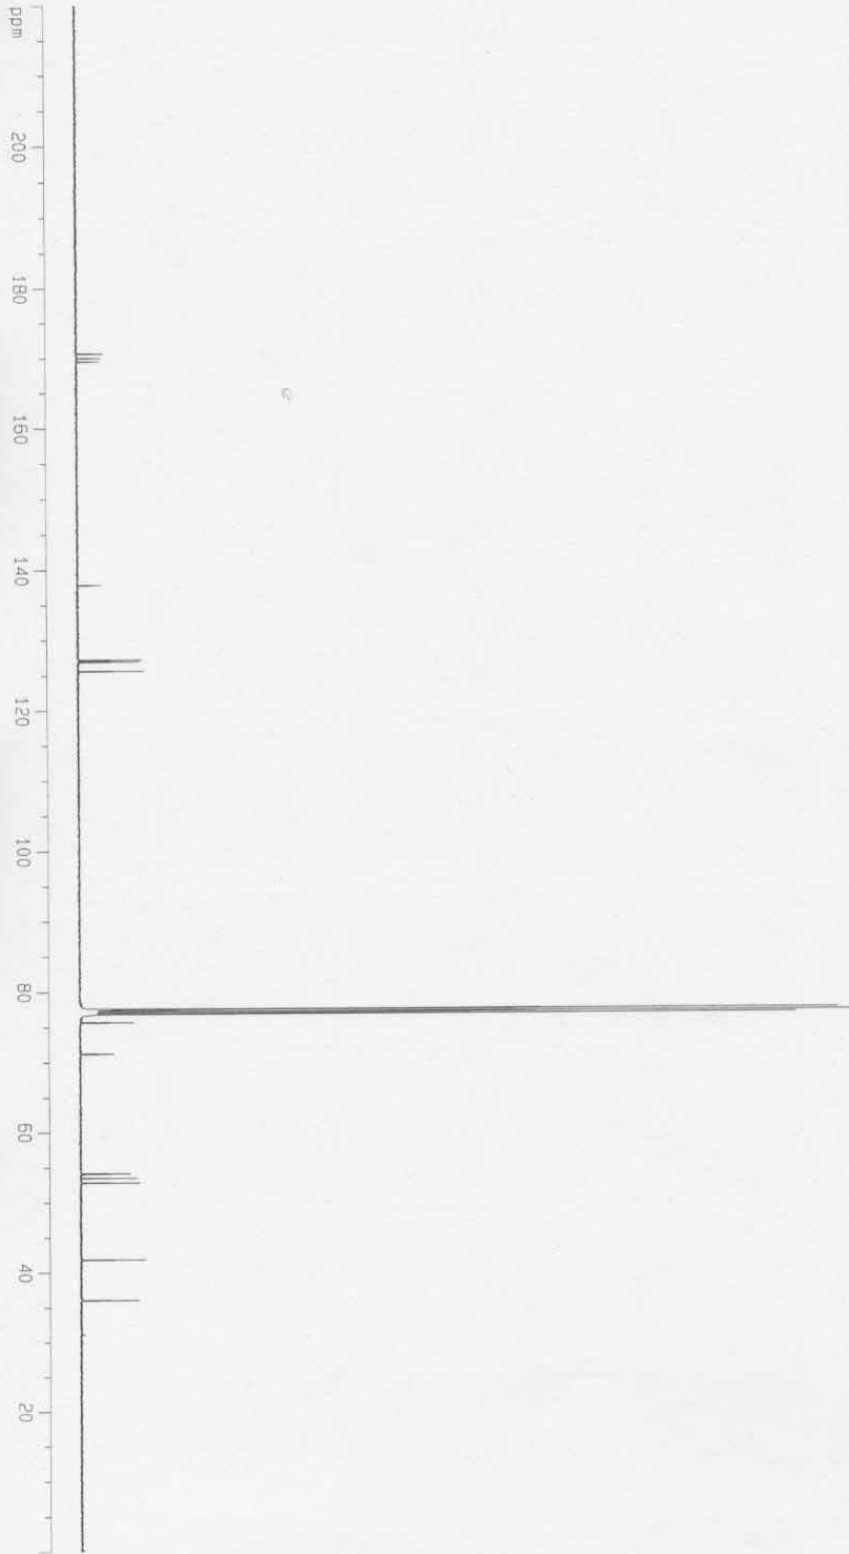

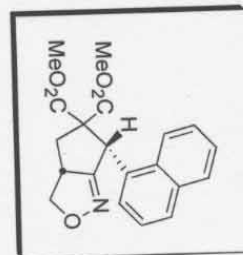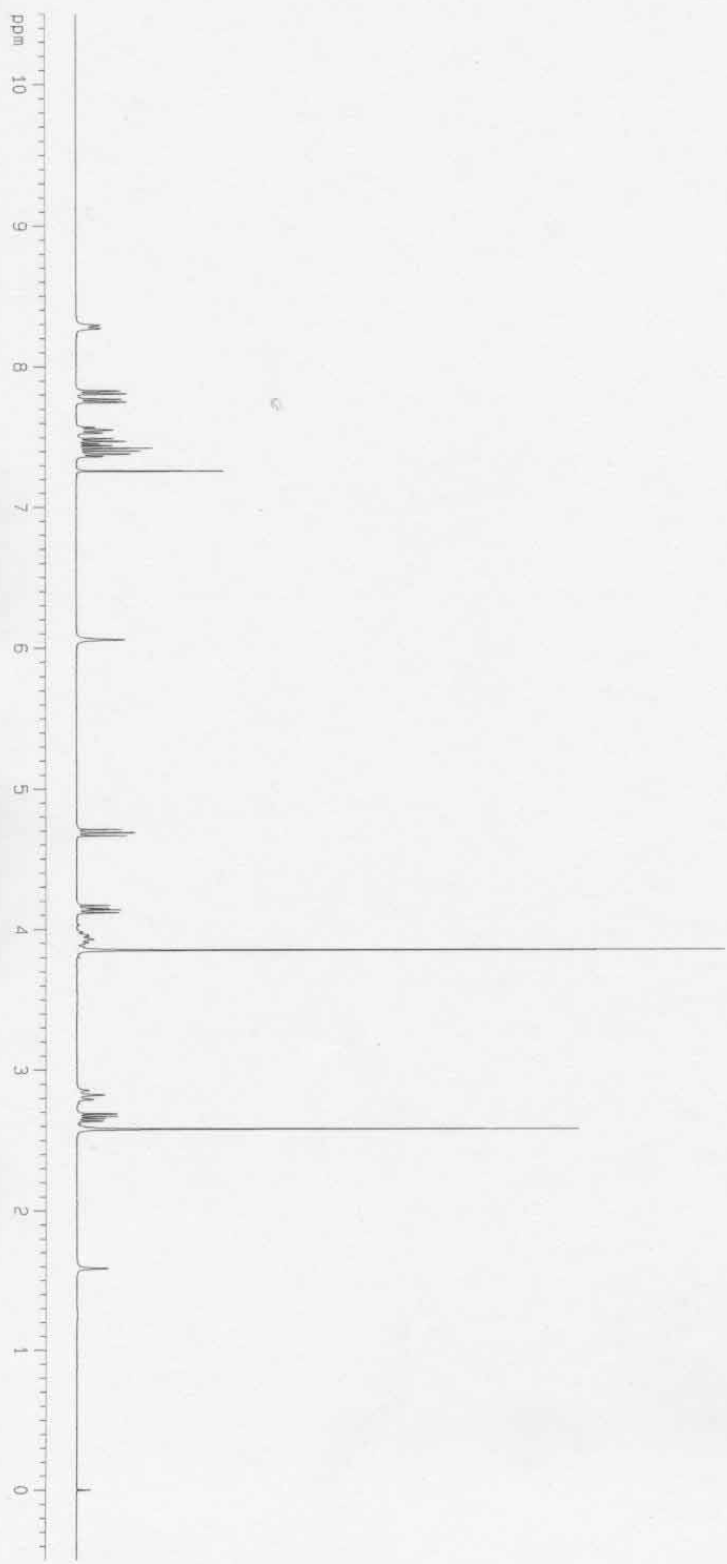

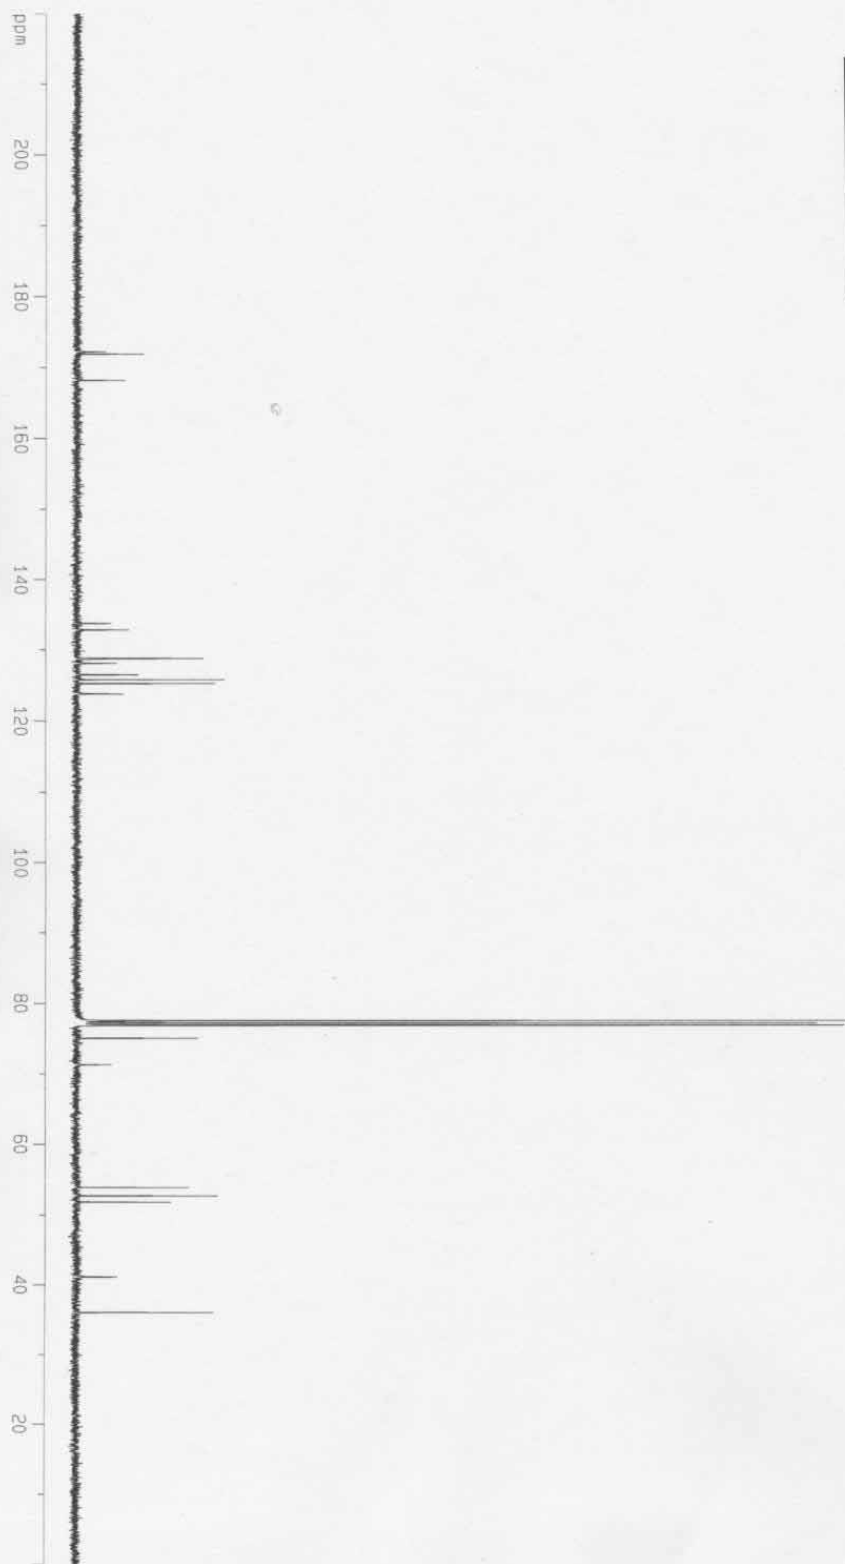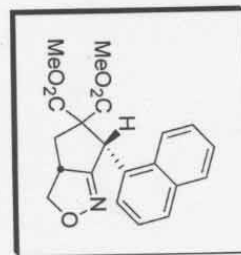

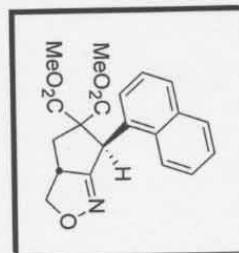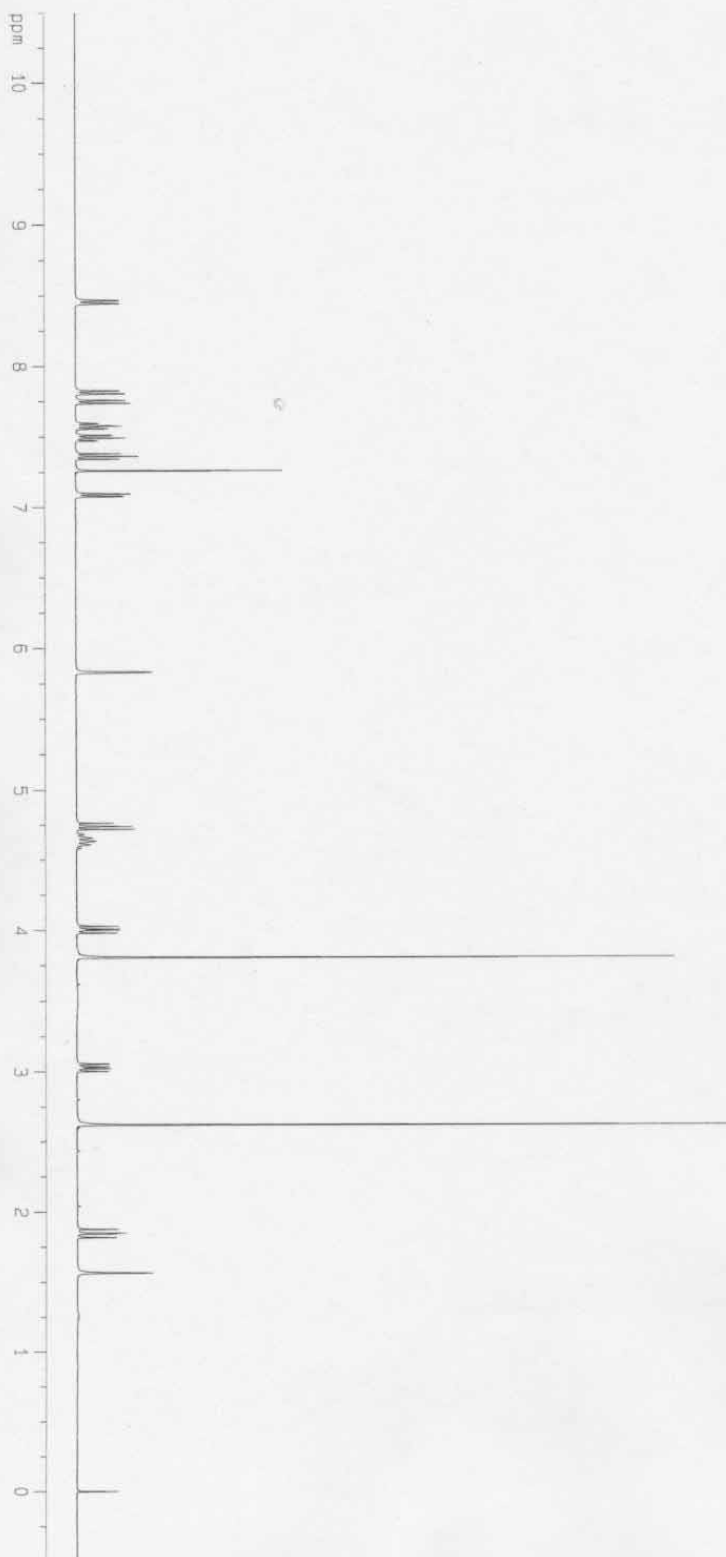

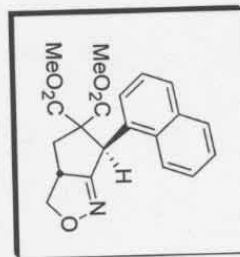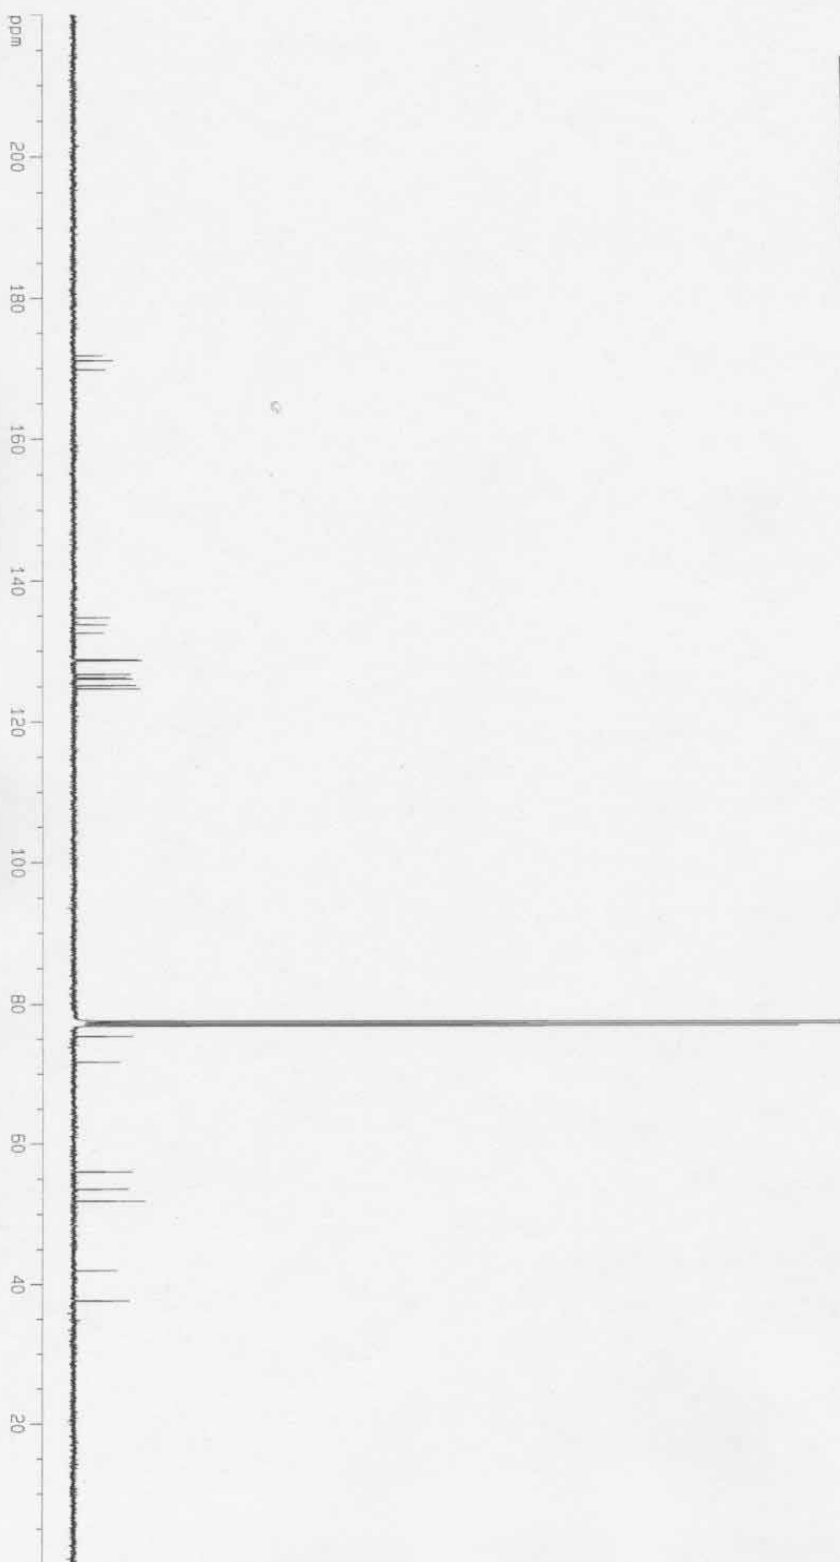



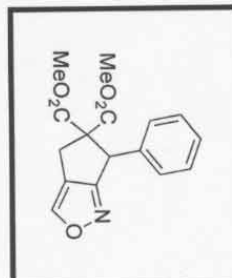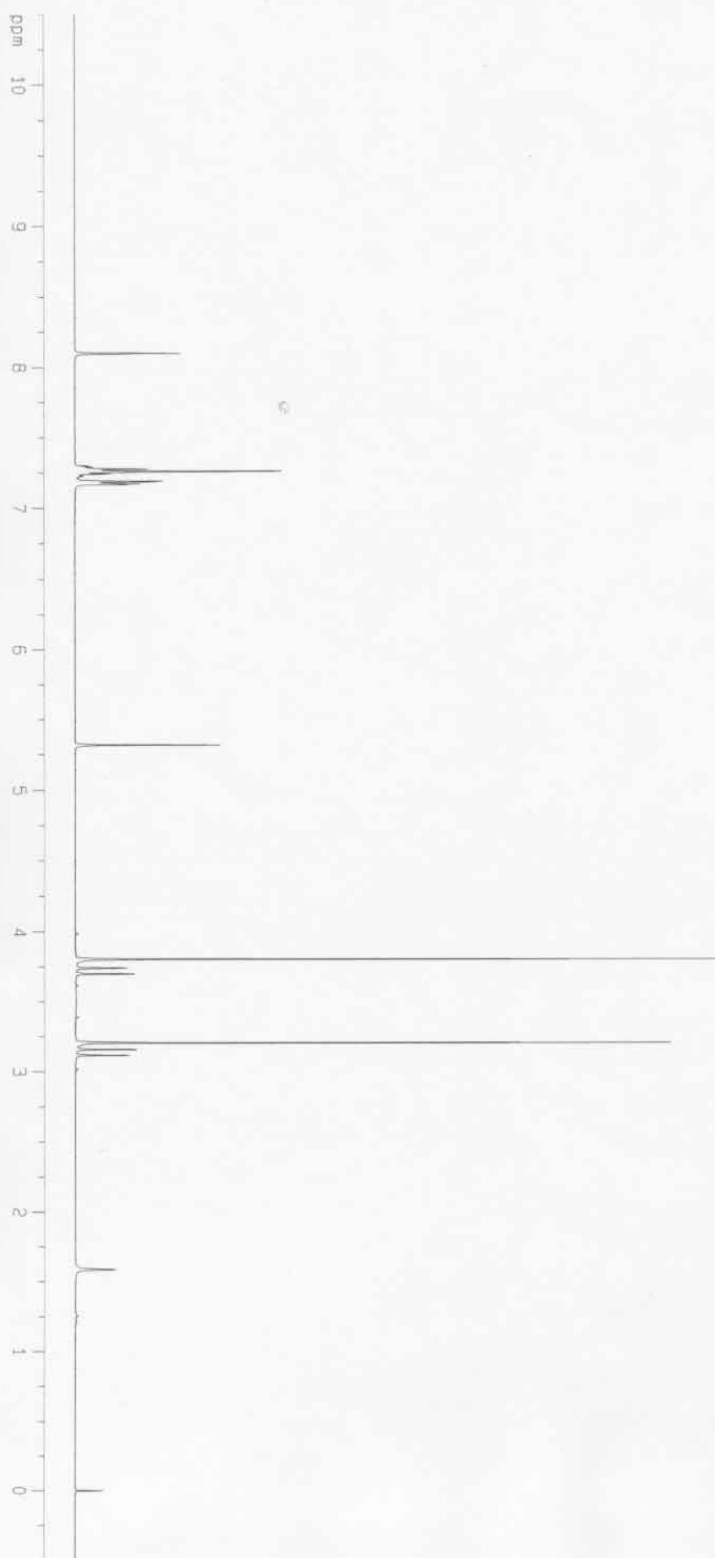

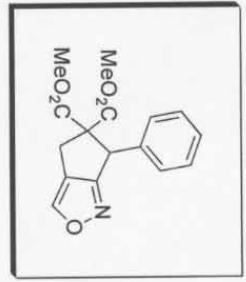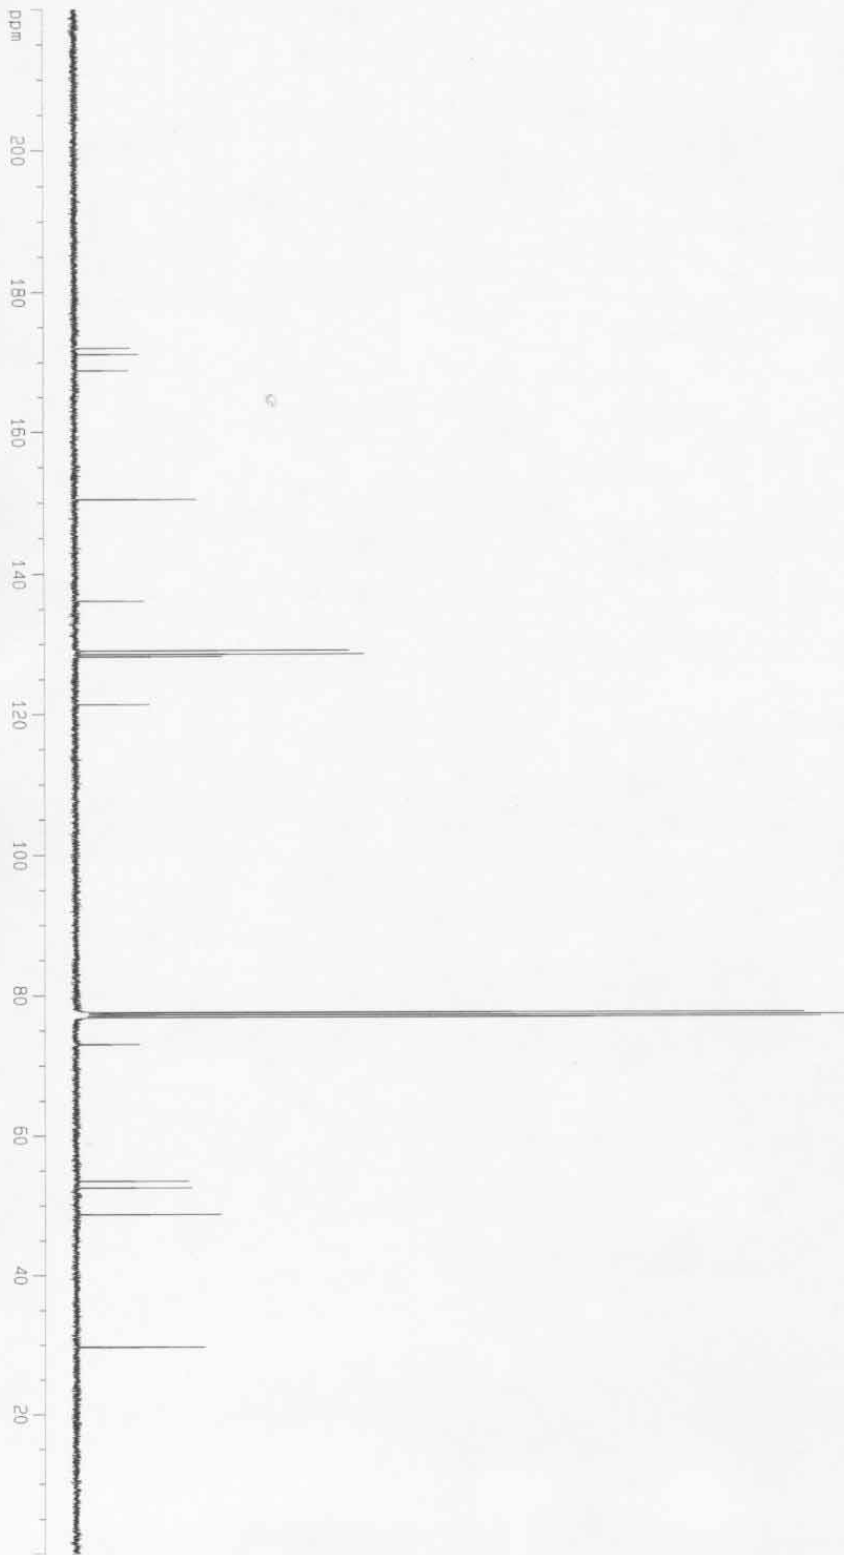

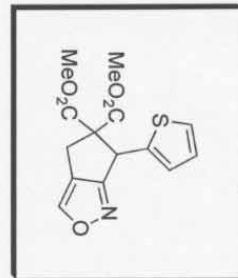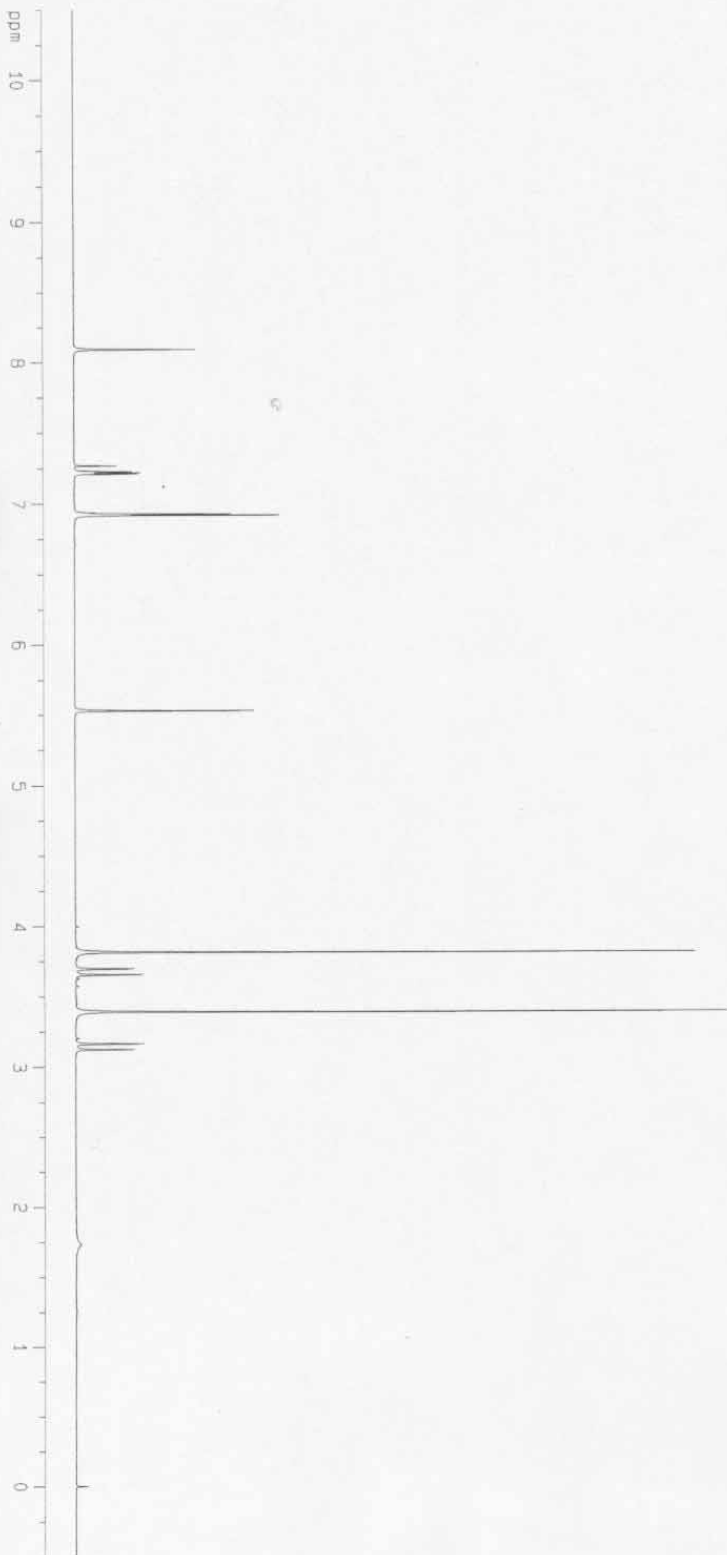

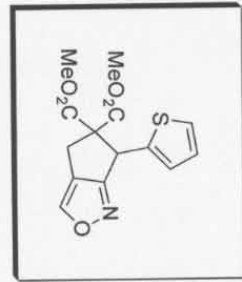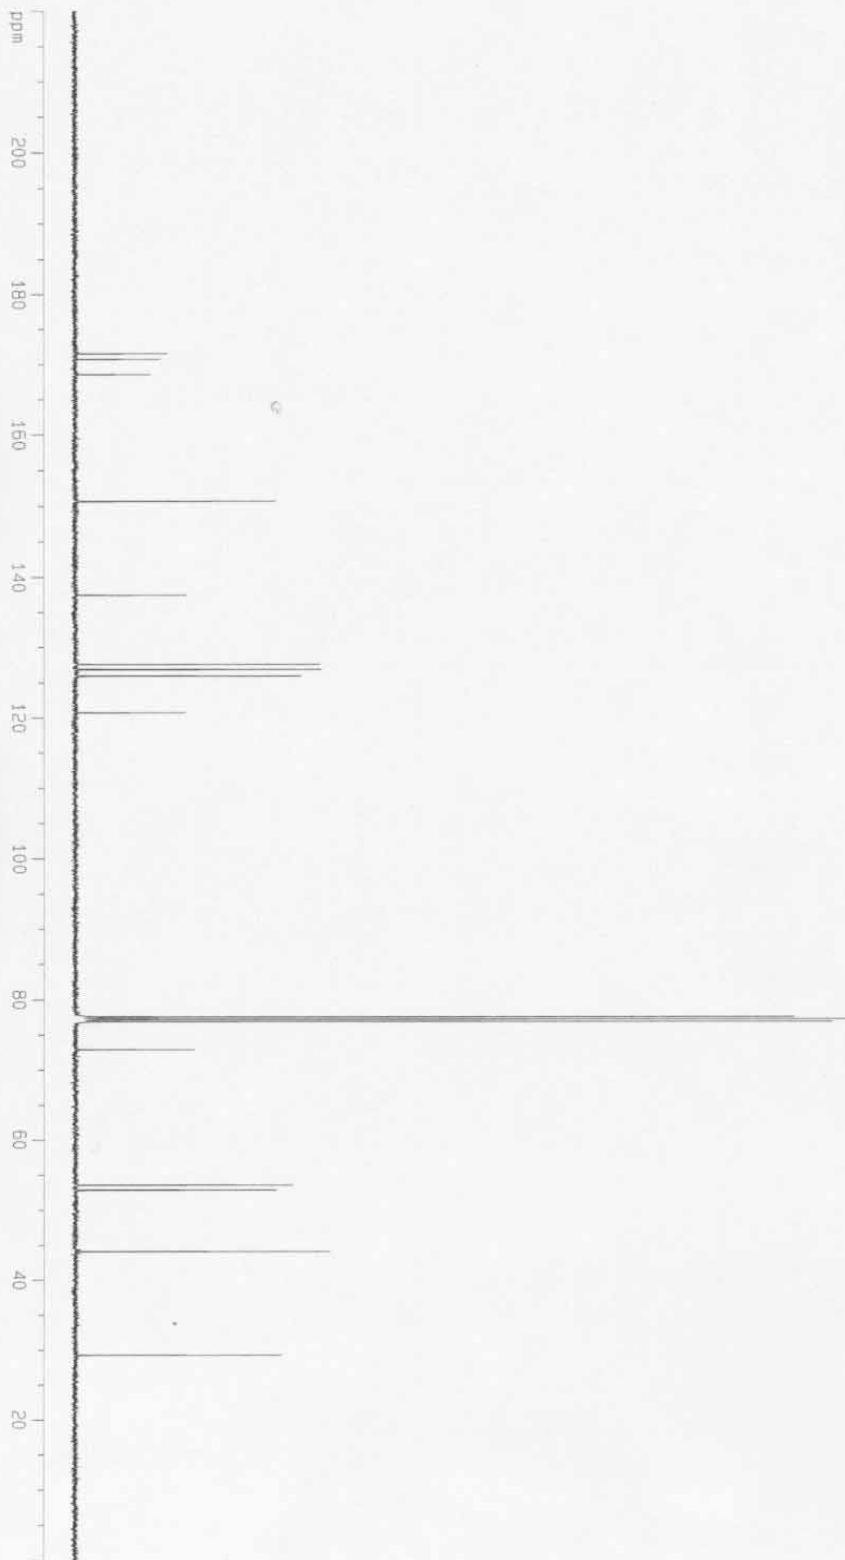

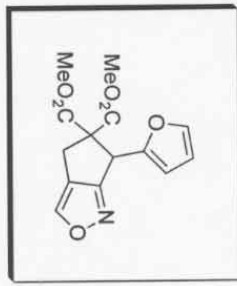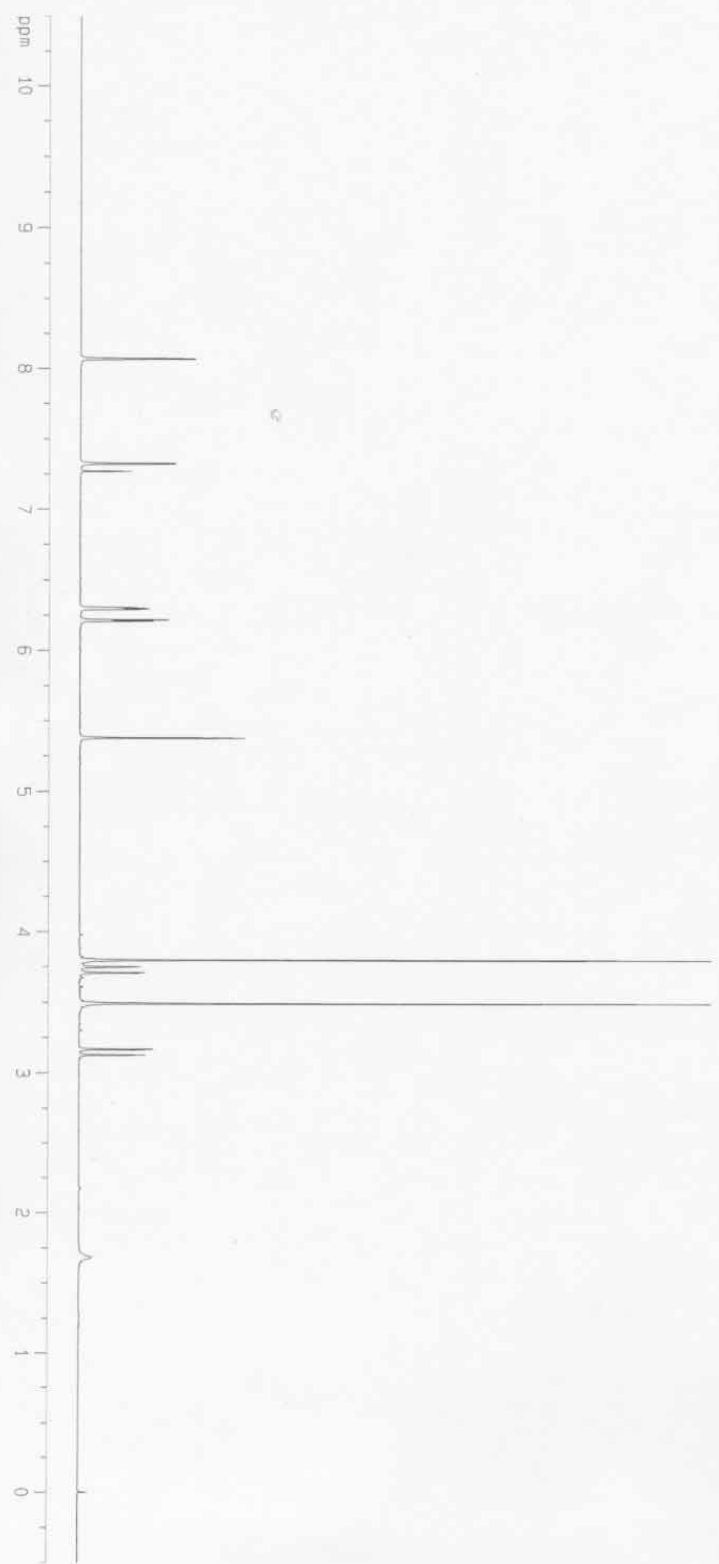

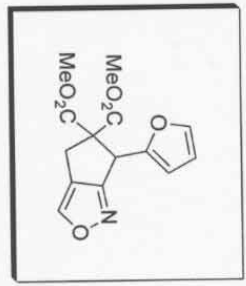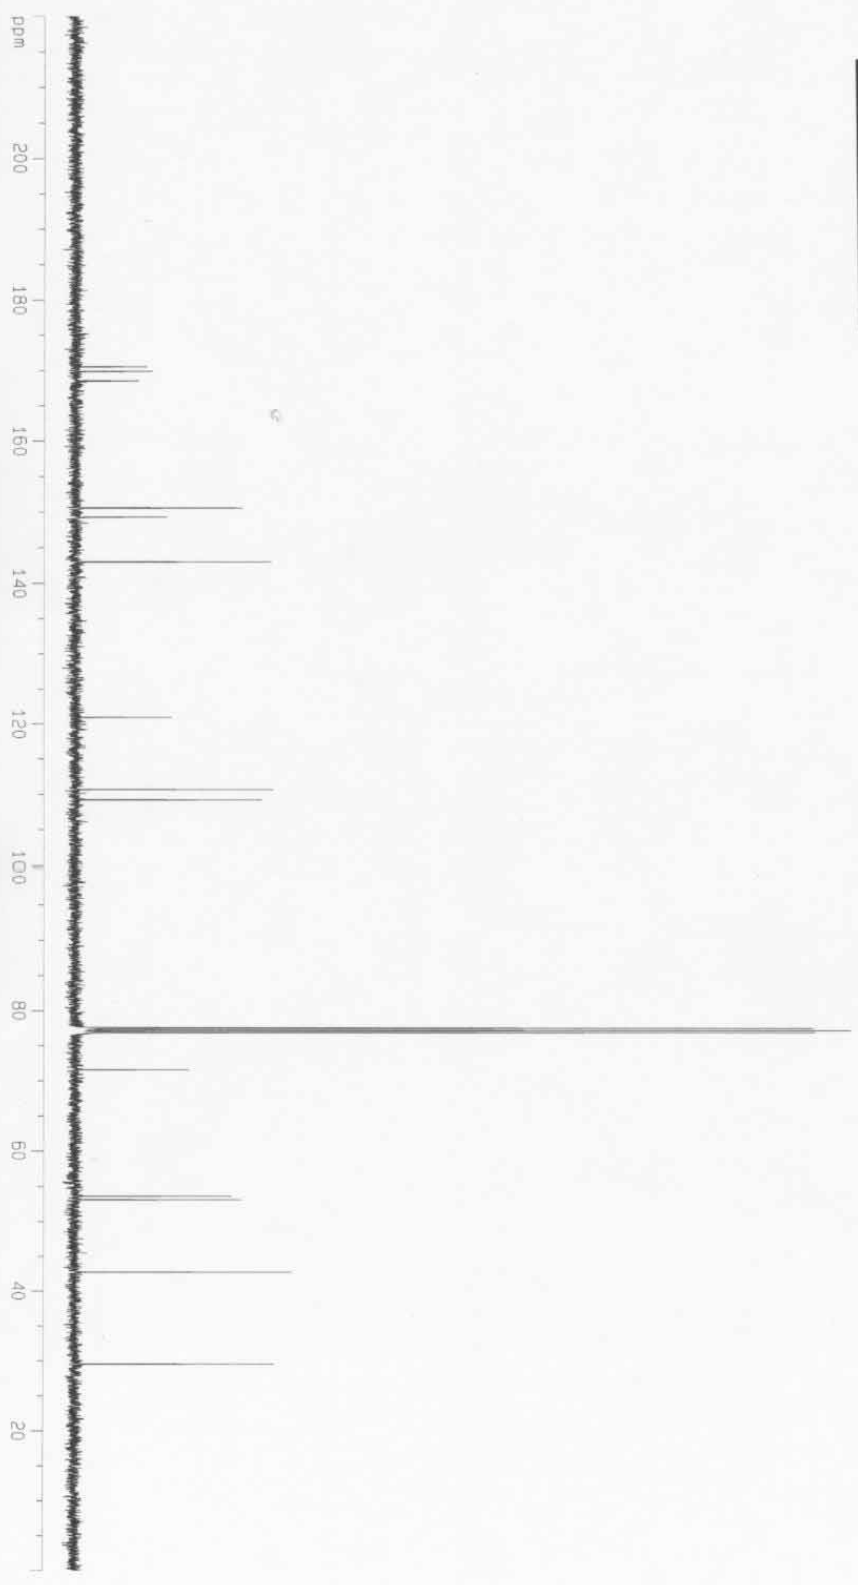

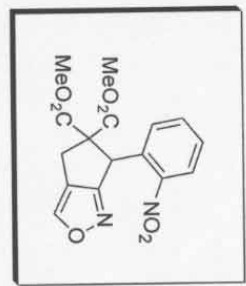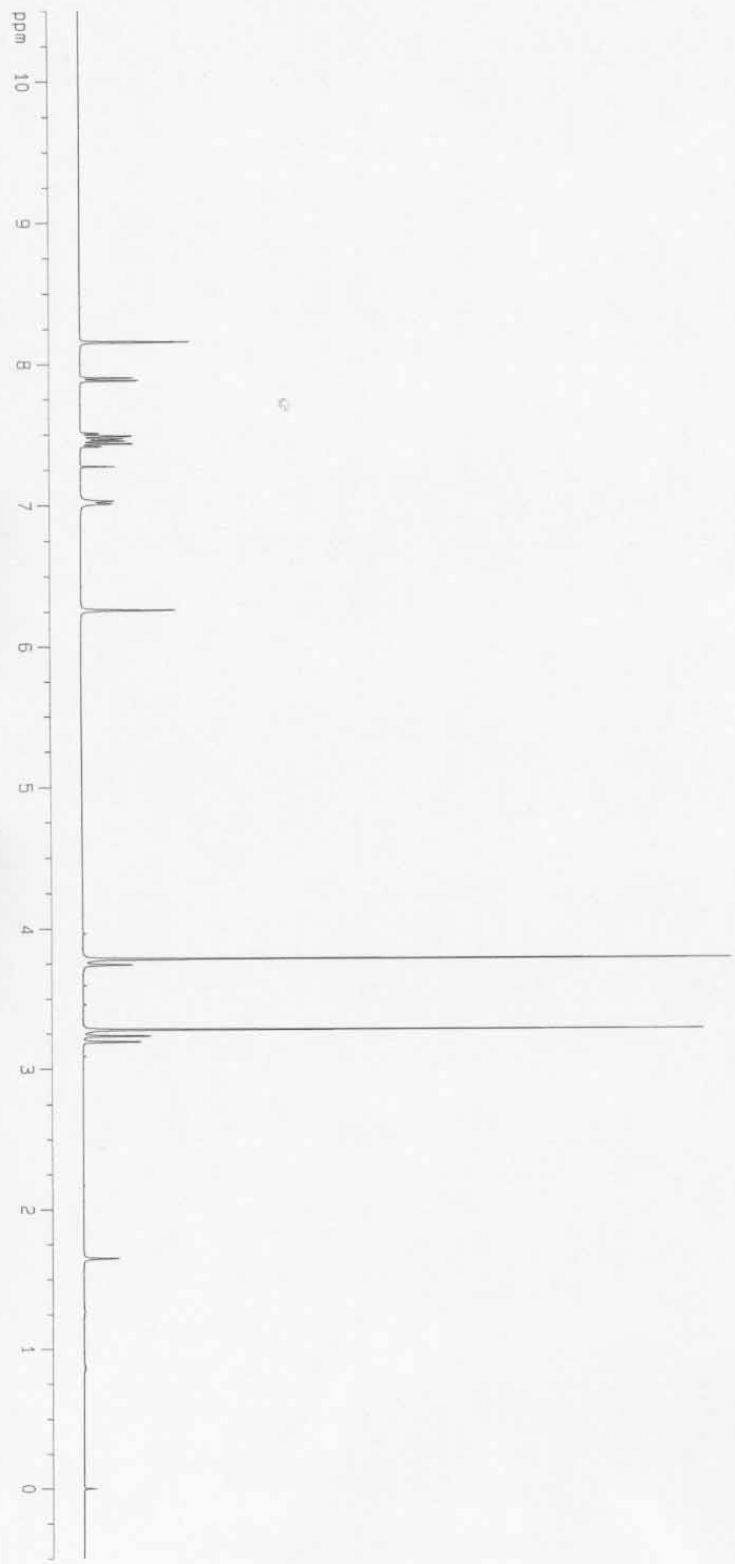

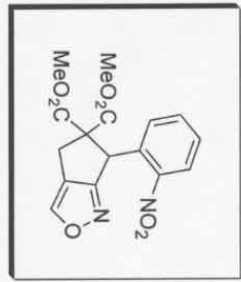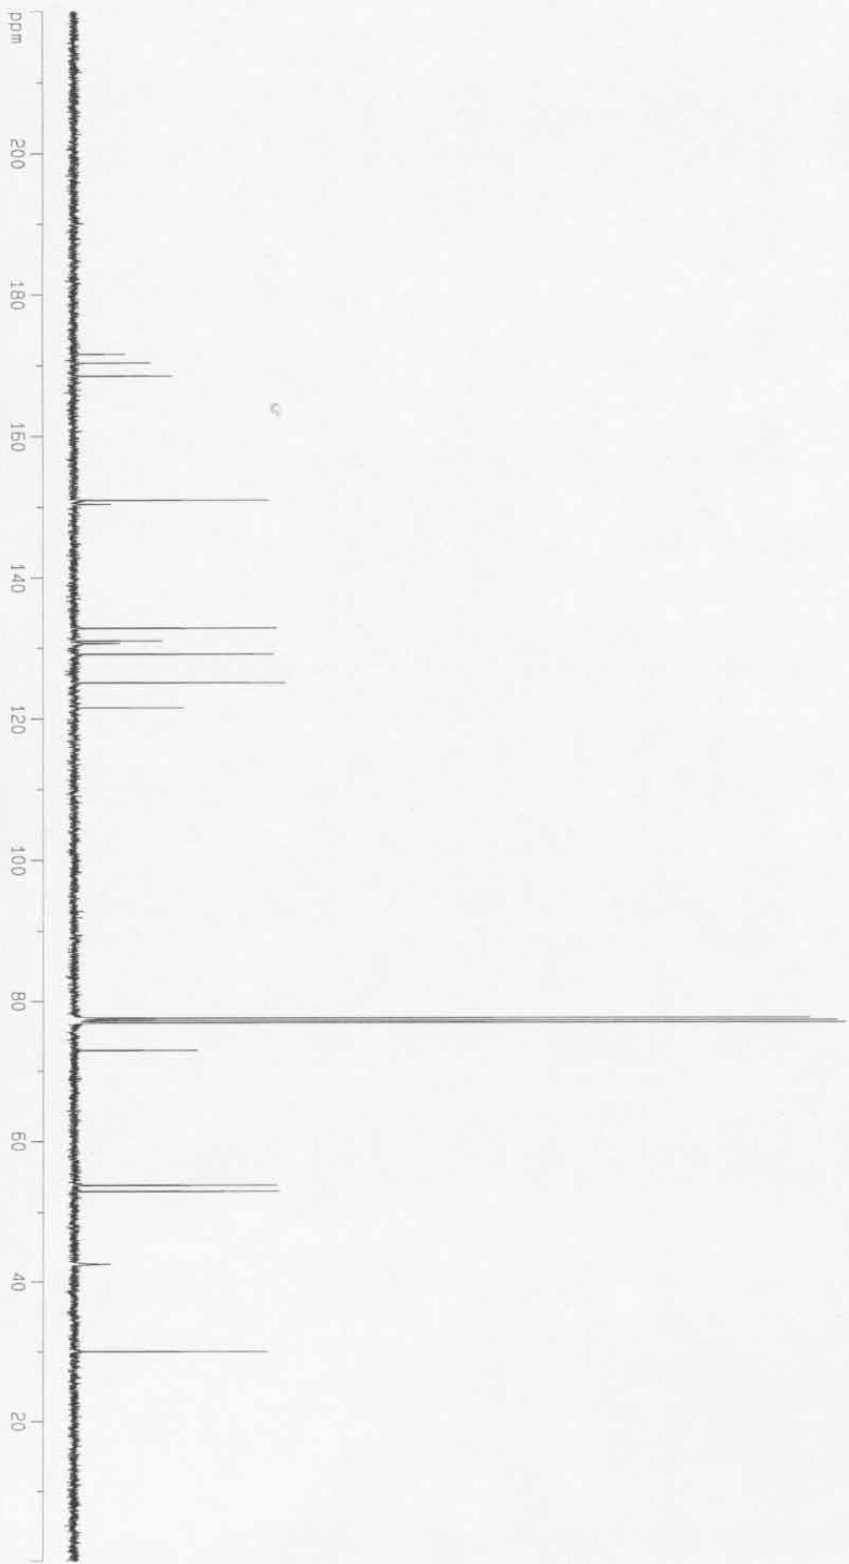



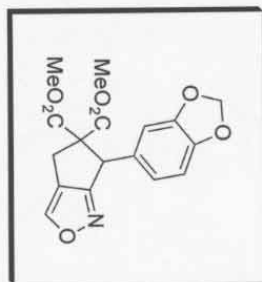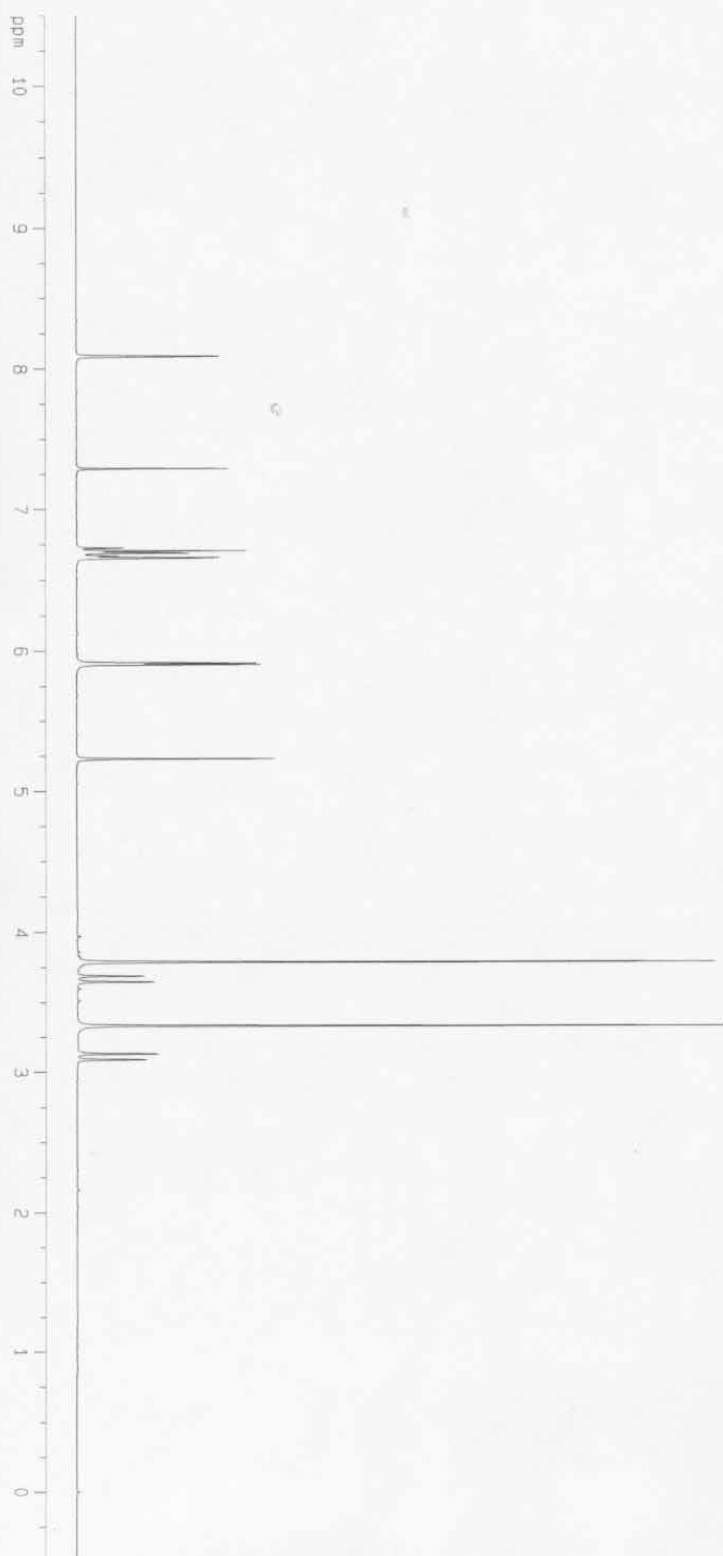

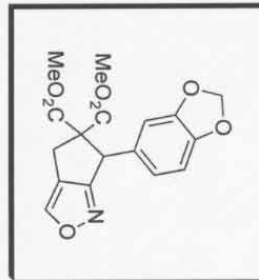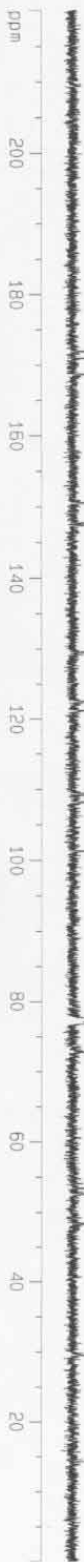

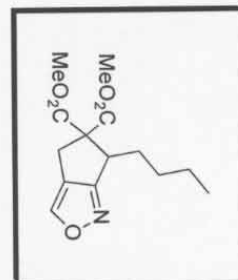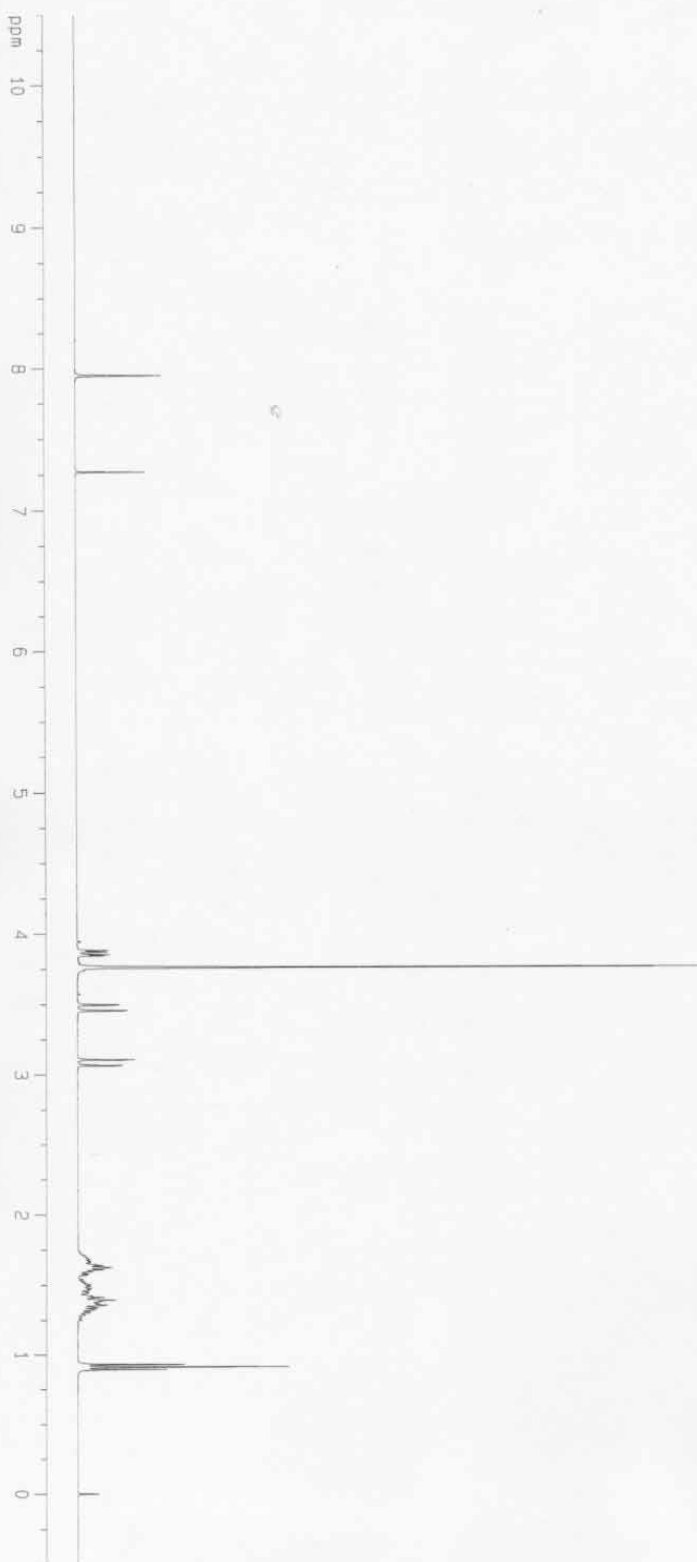

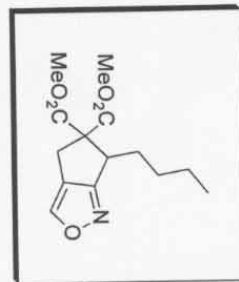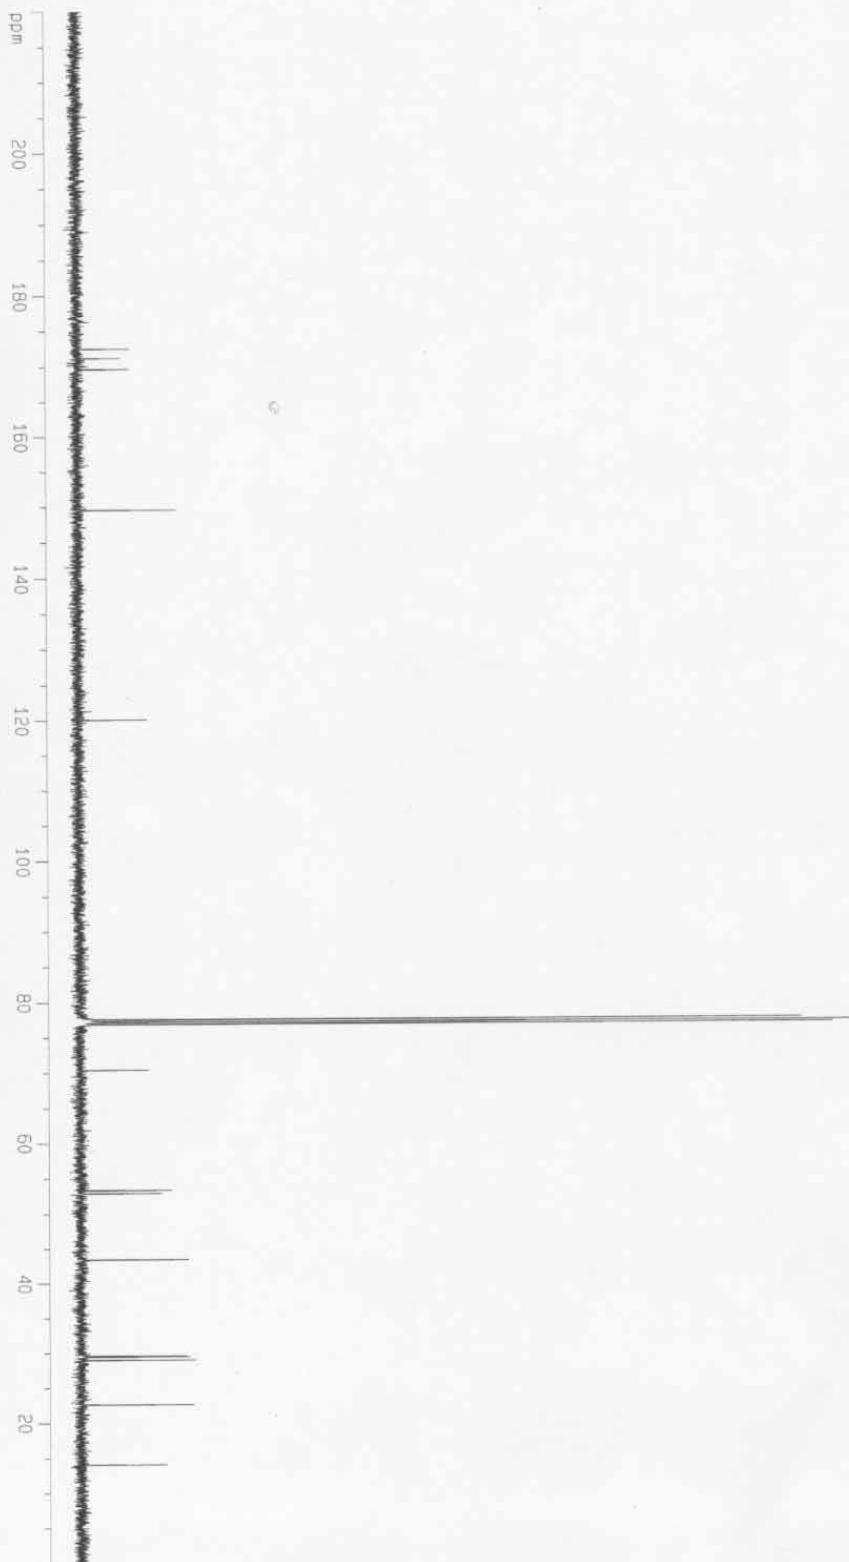

Supplement: b606717d-2.pdf [file b606717d-2.pdf]

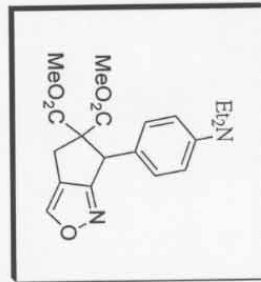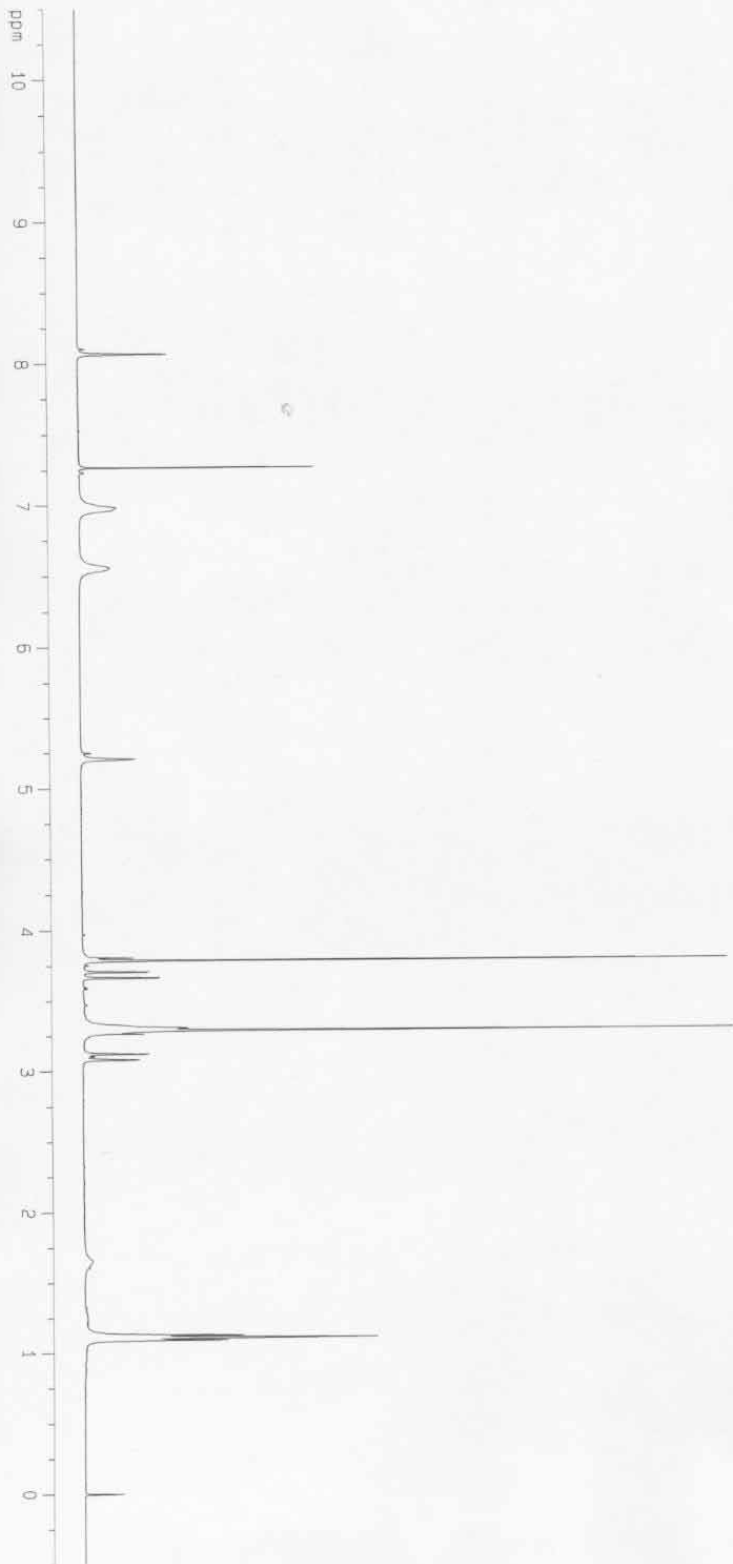

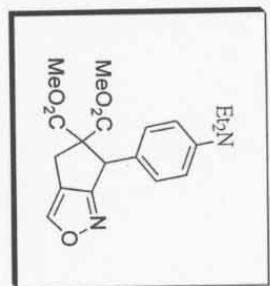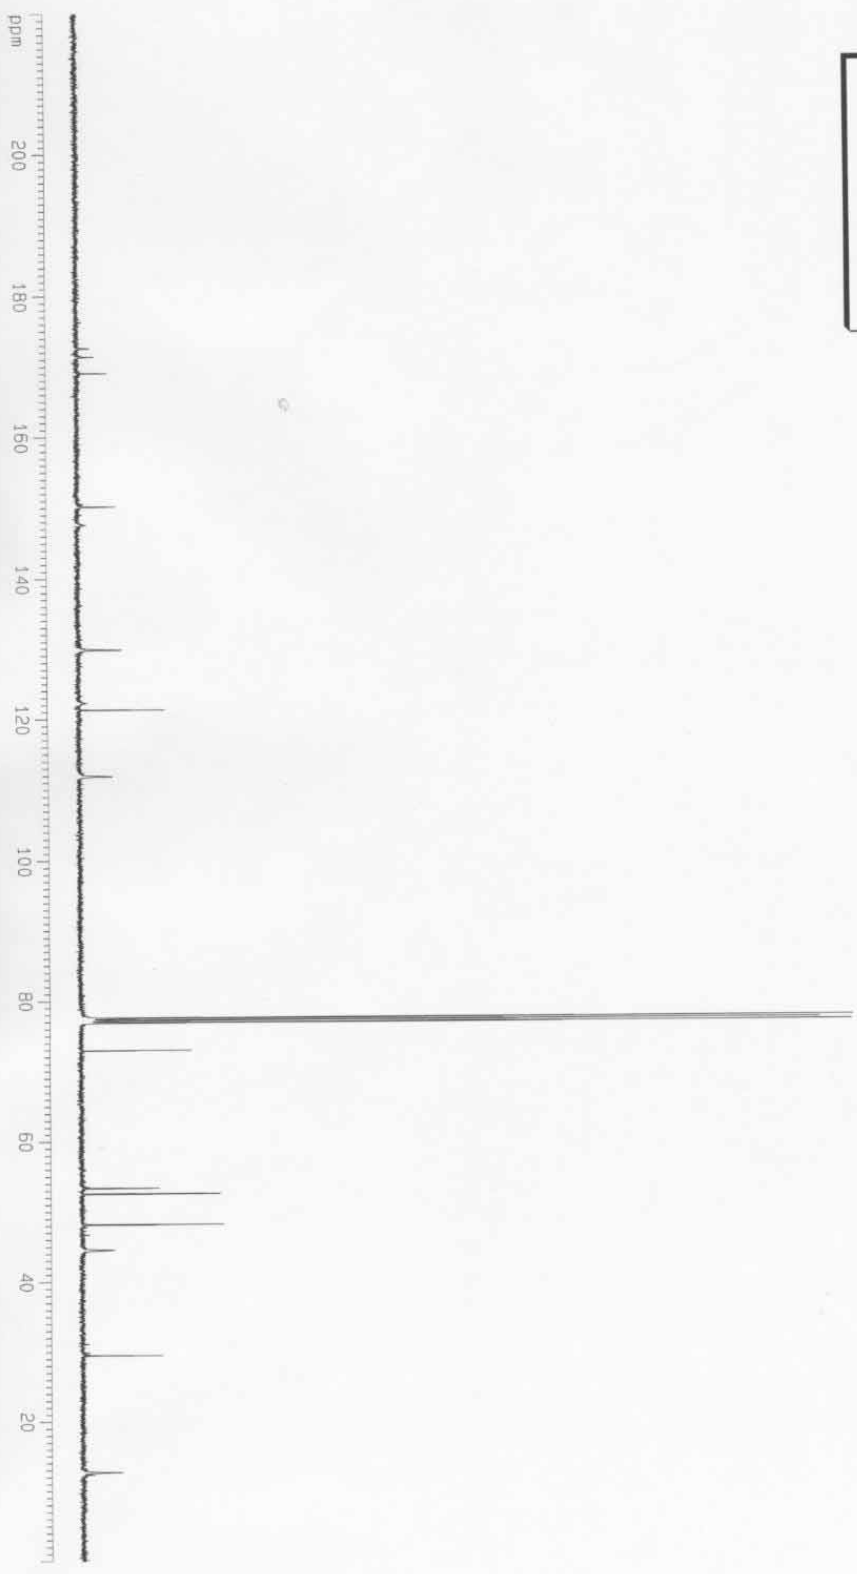

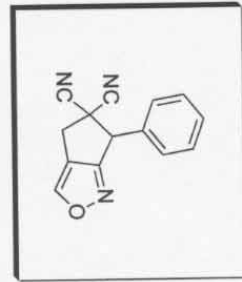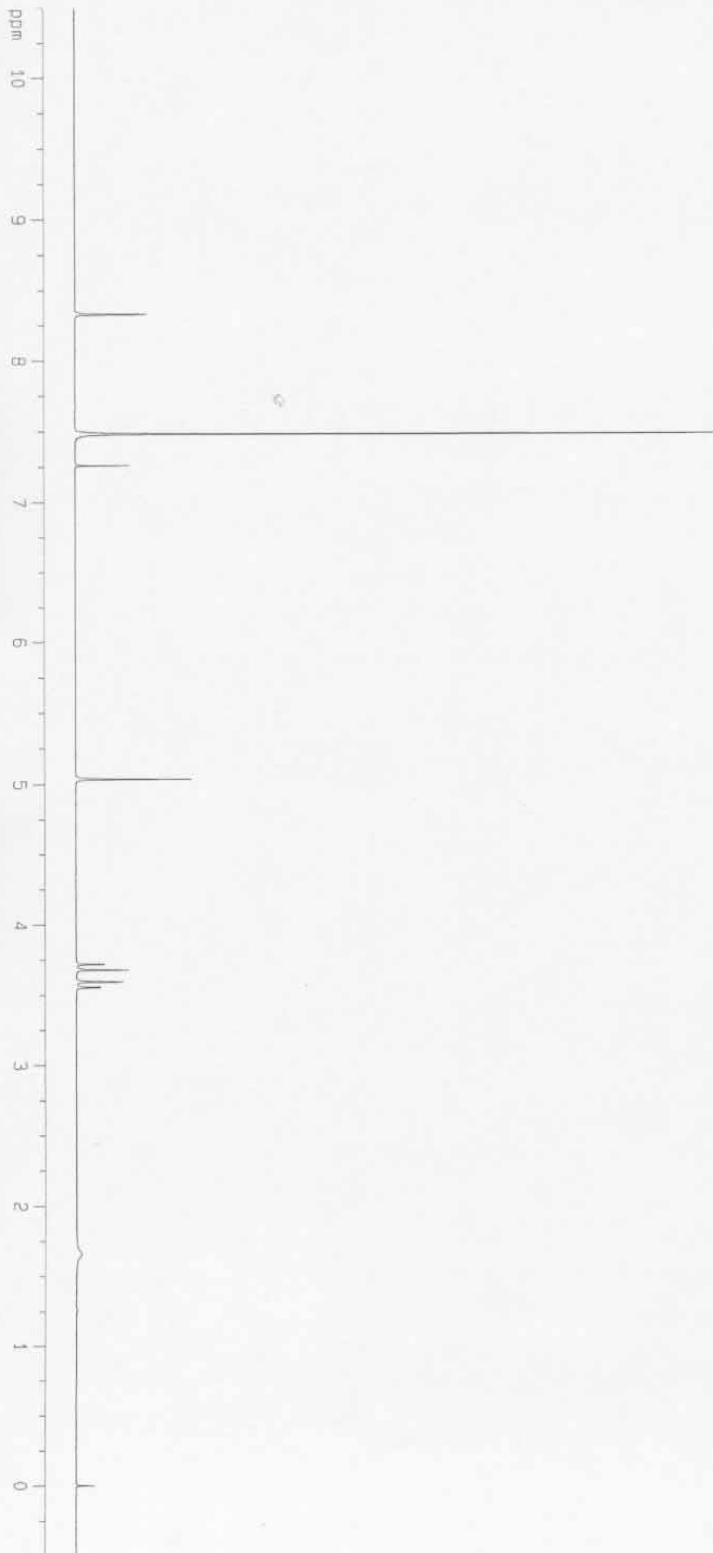

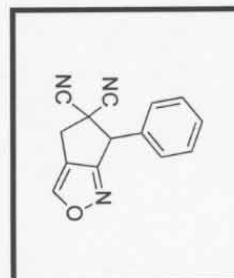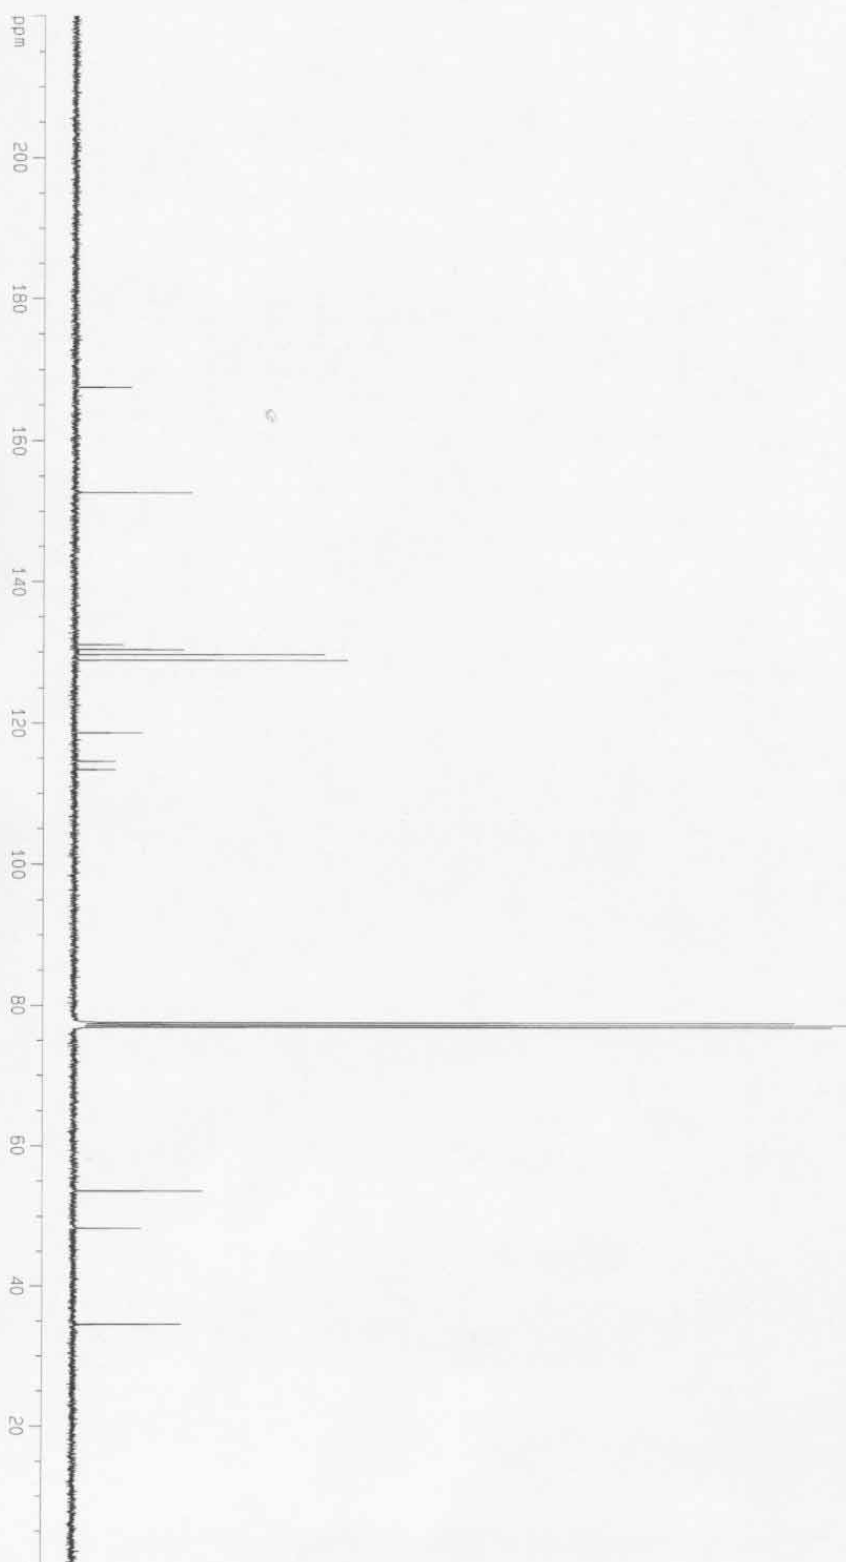

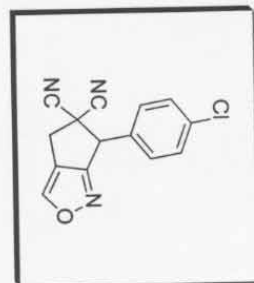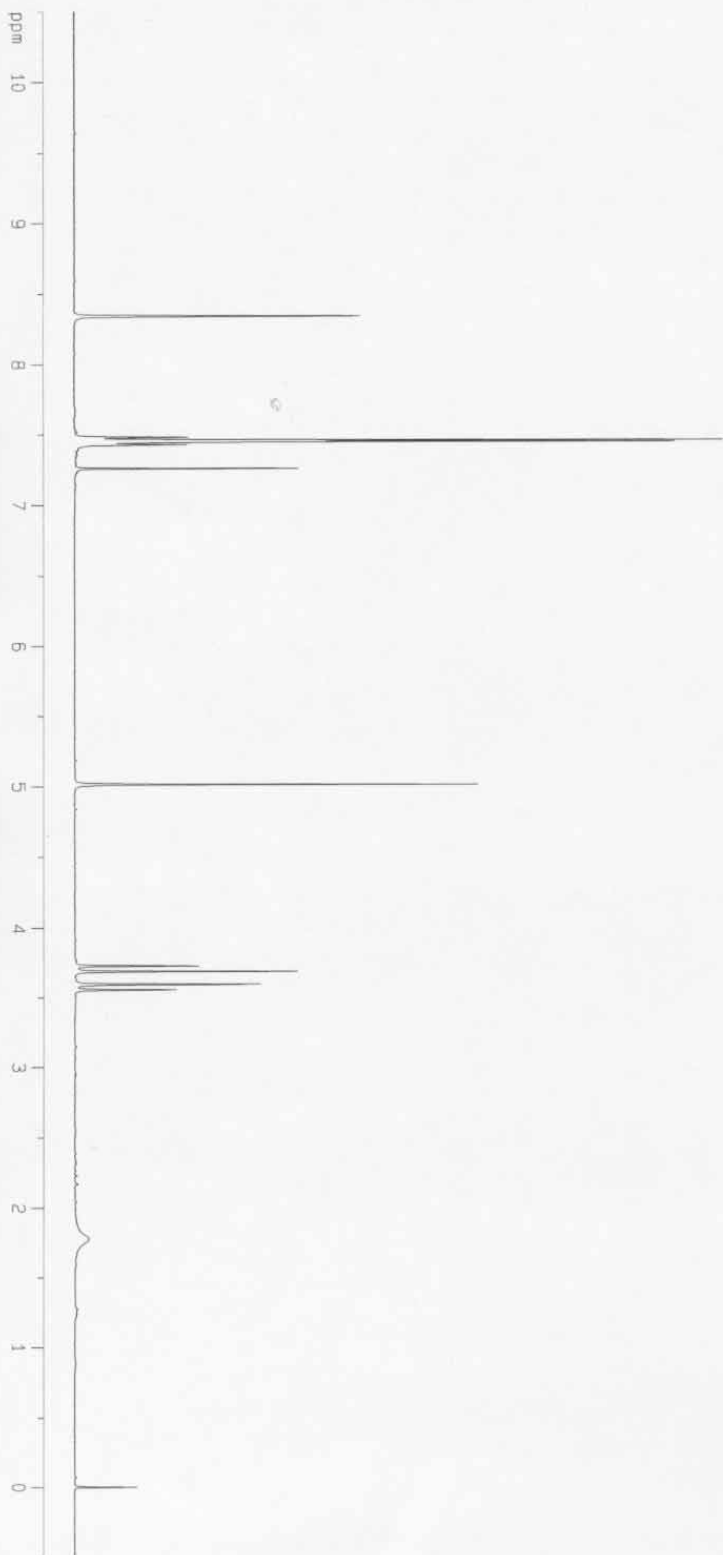

4

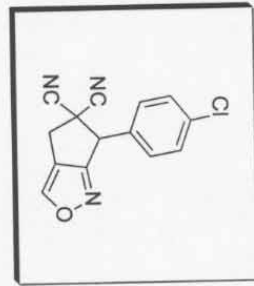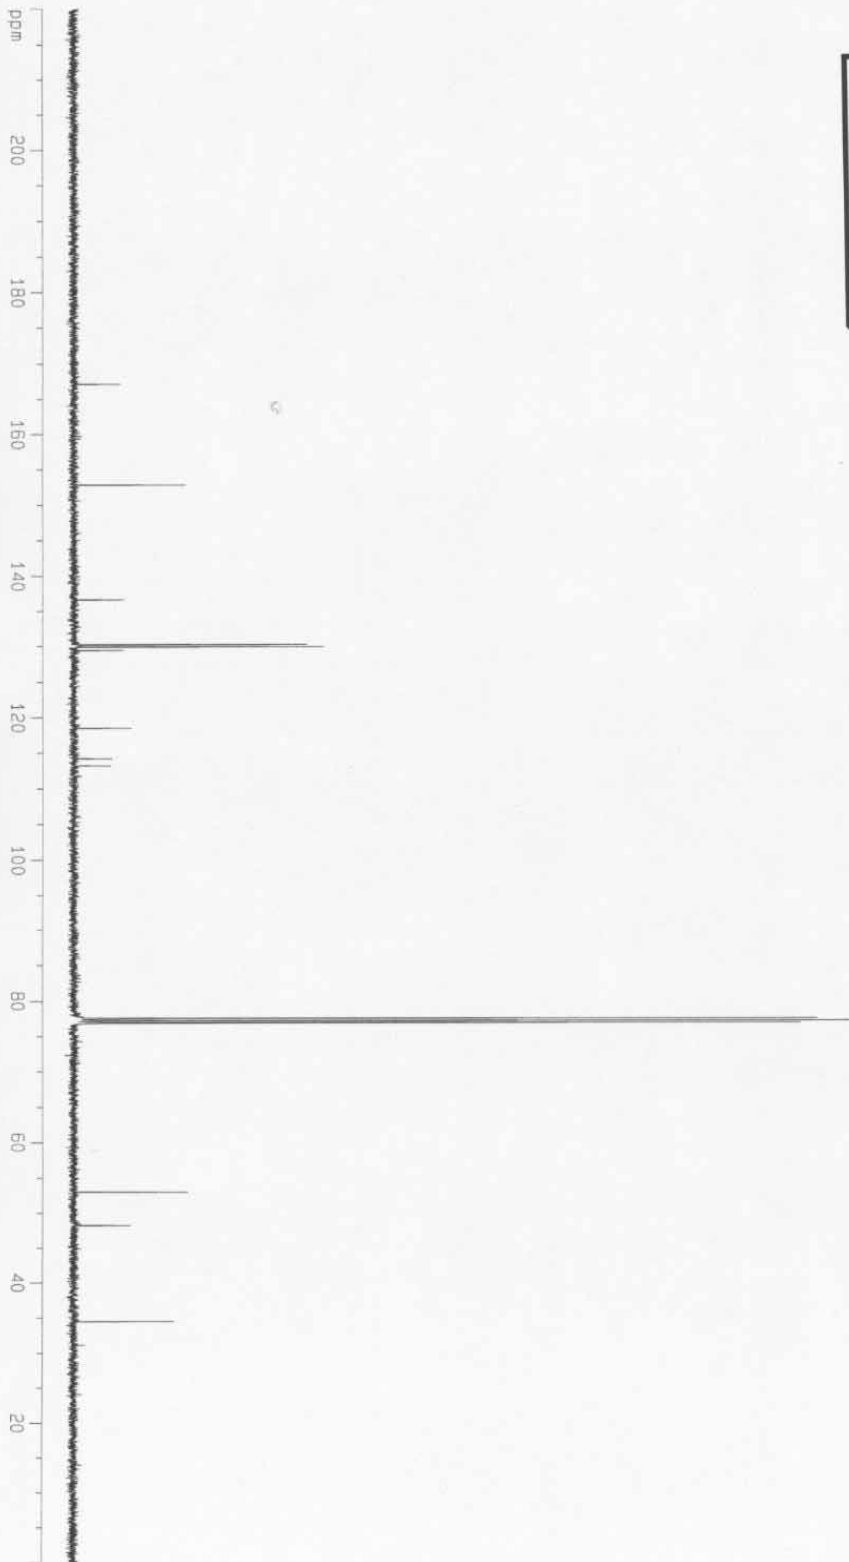

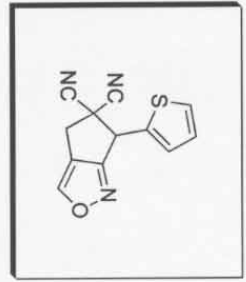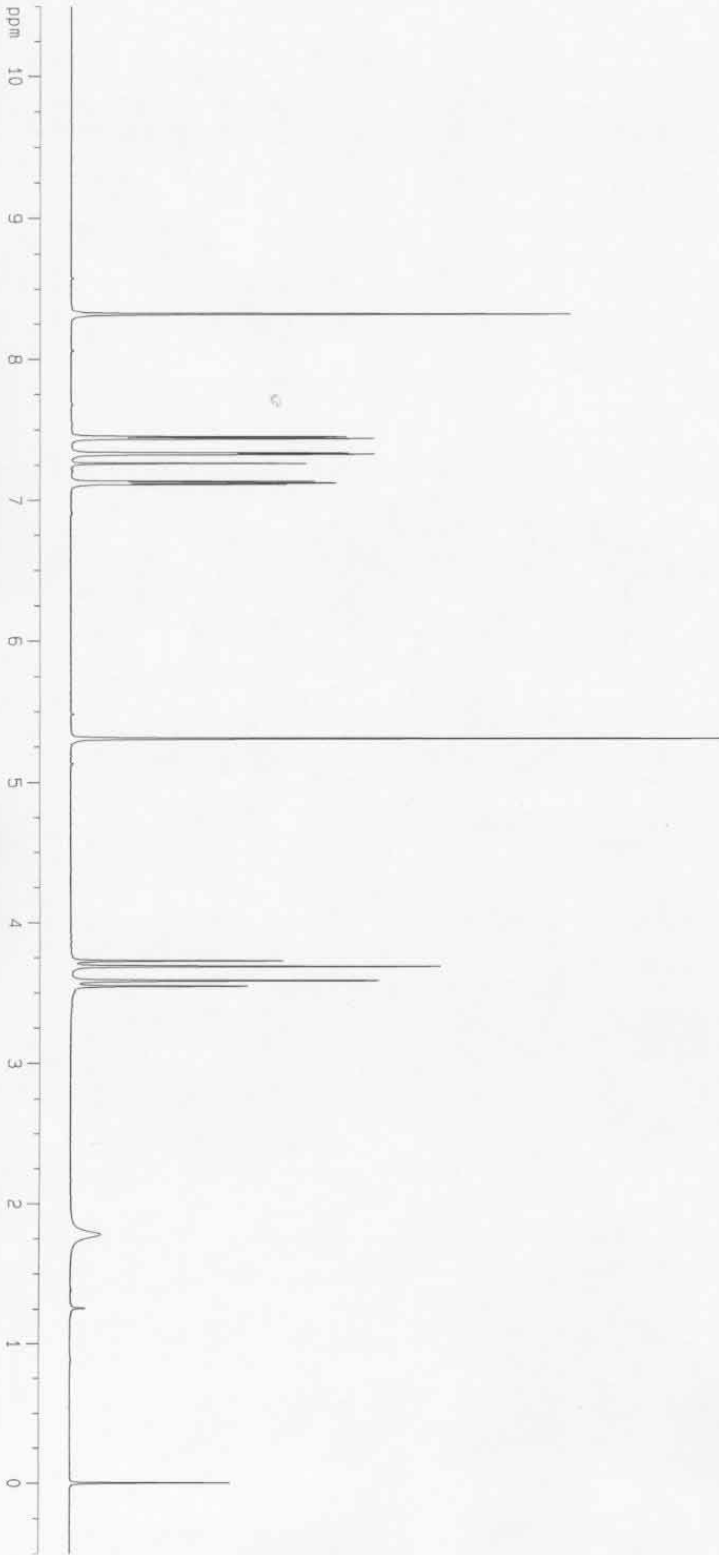

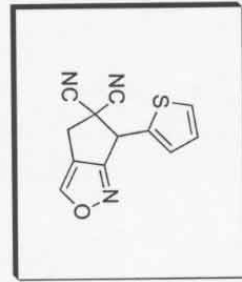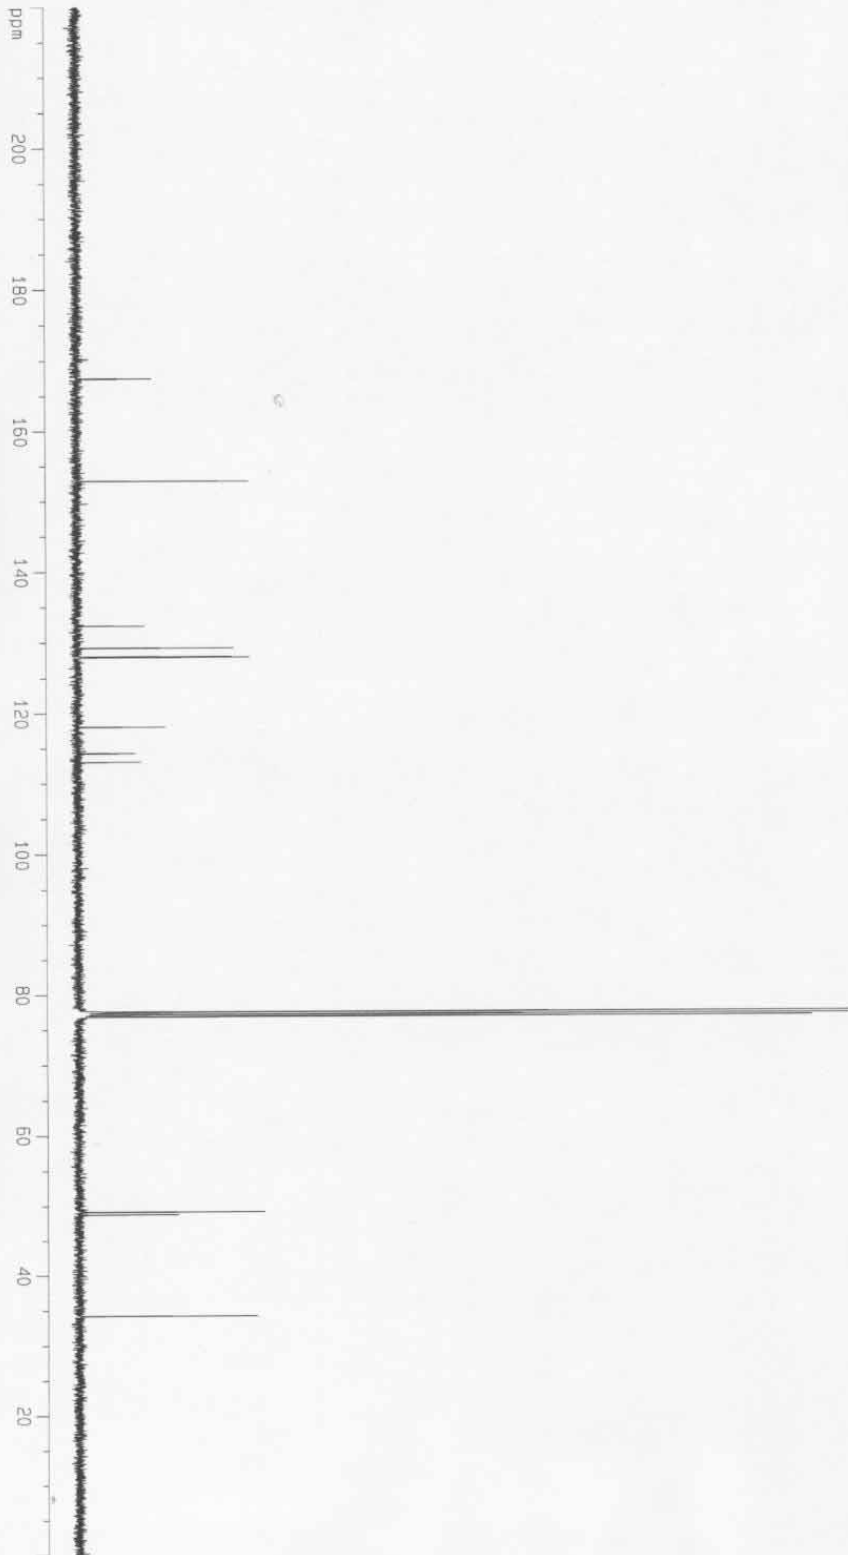



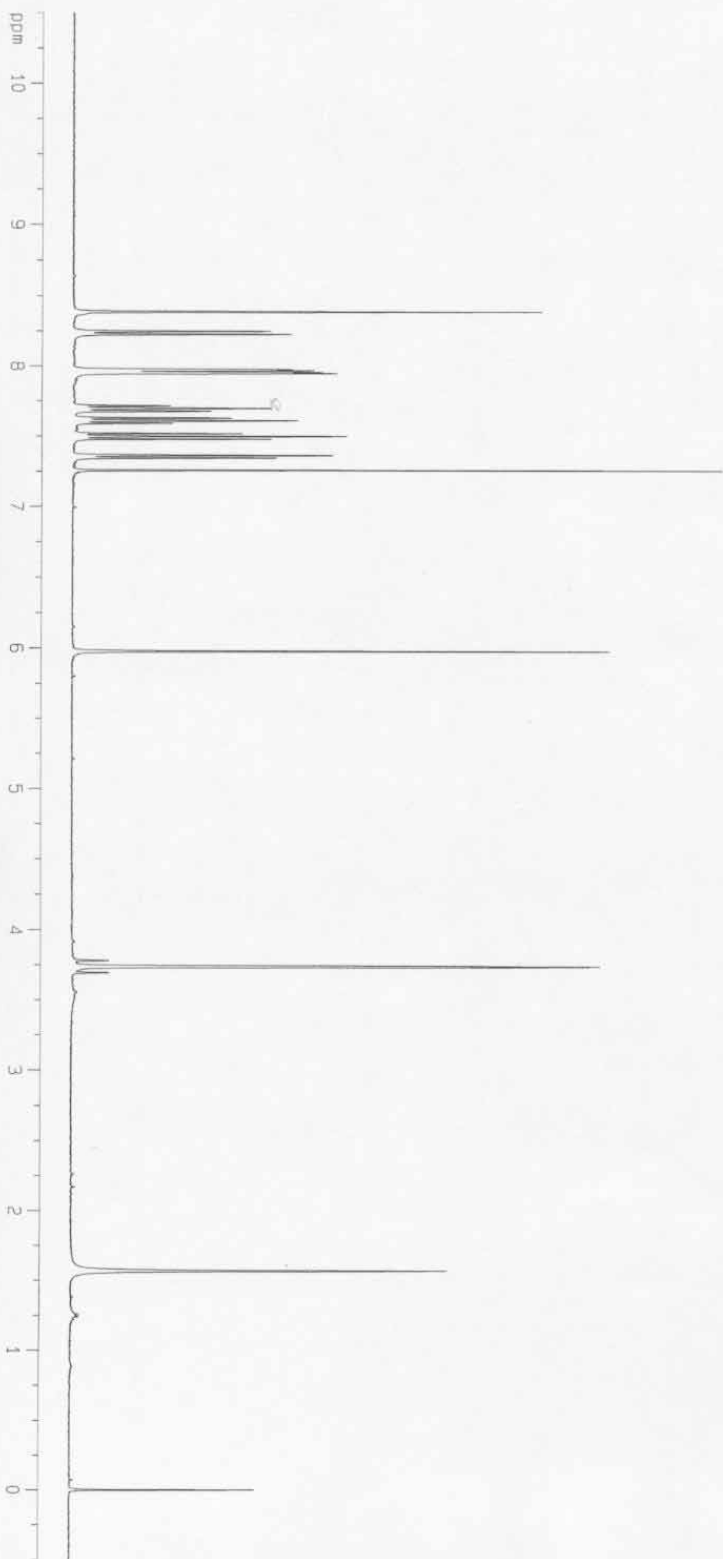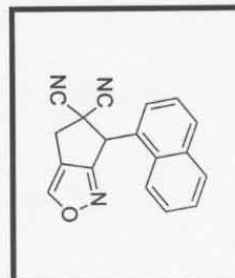

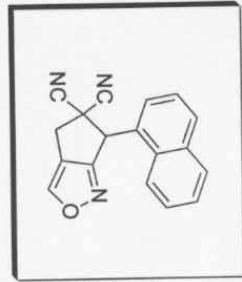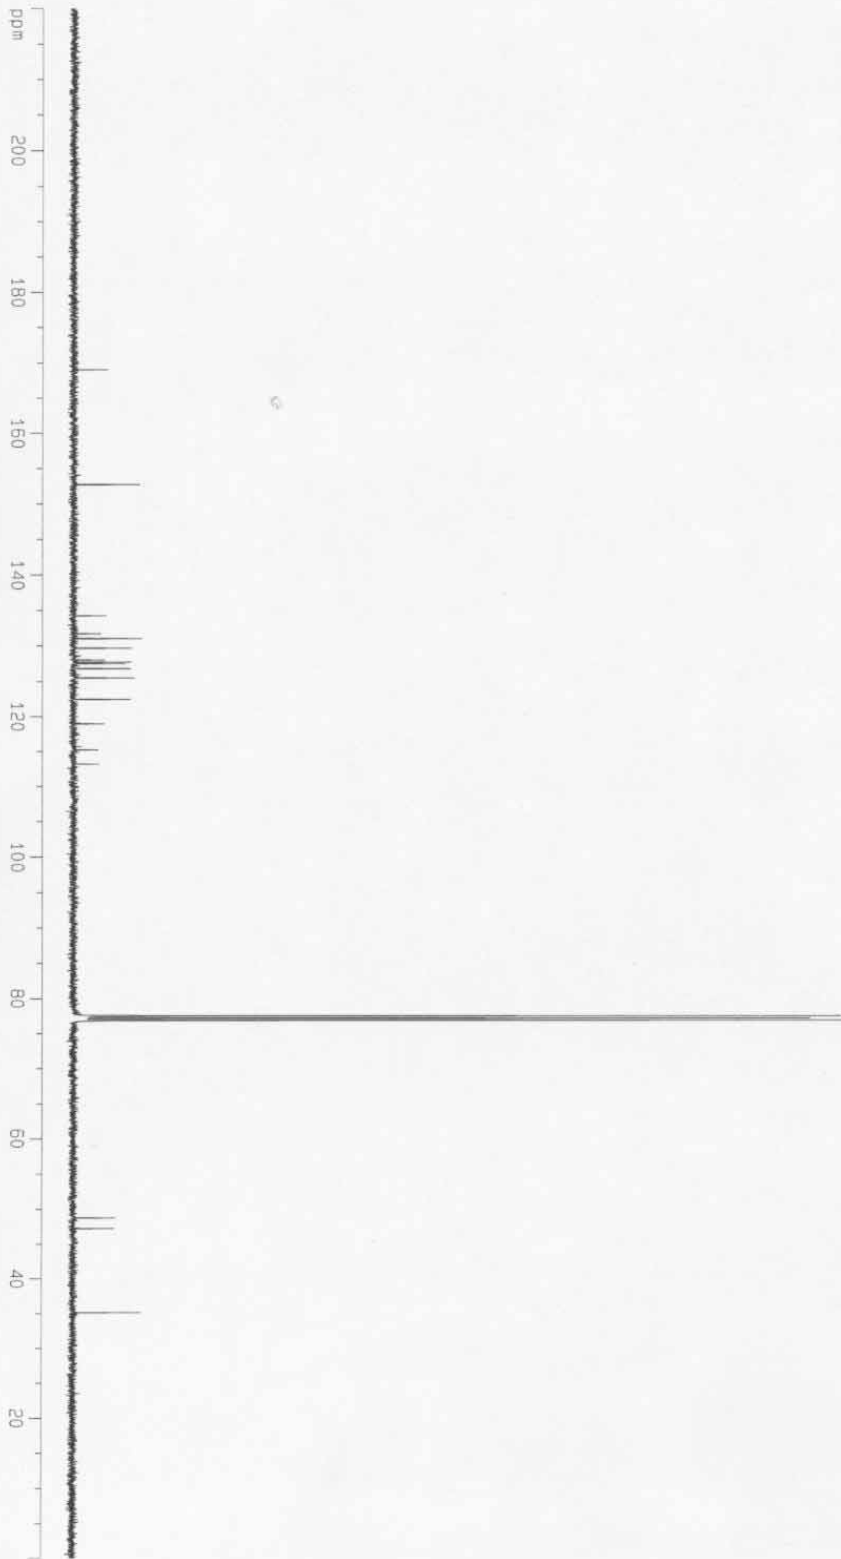

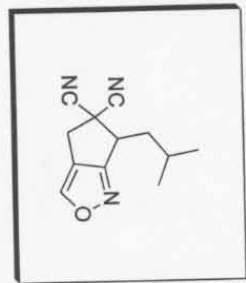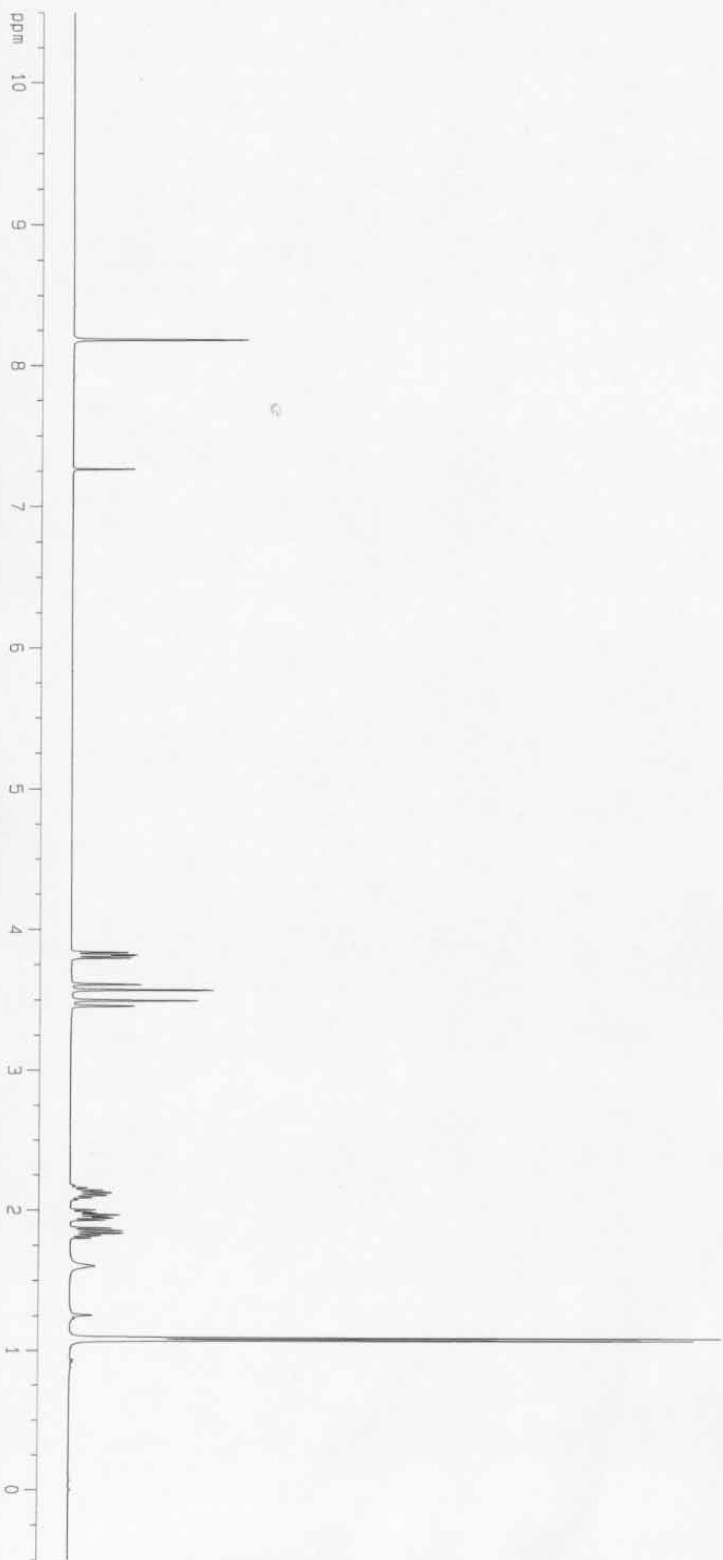

4

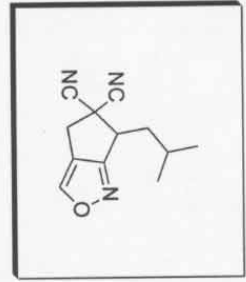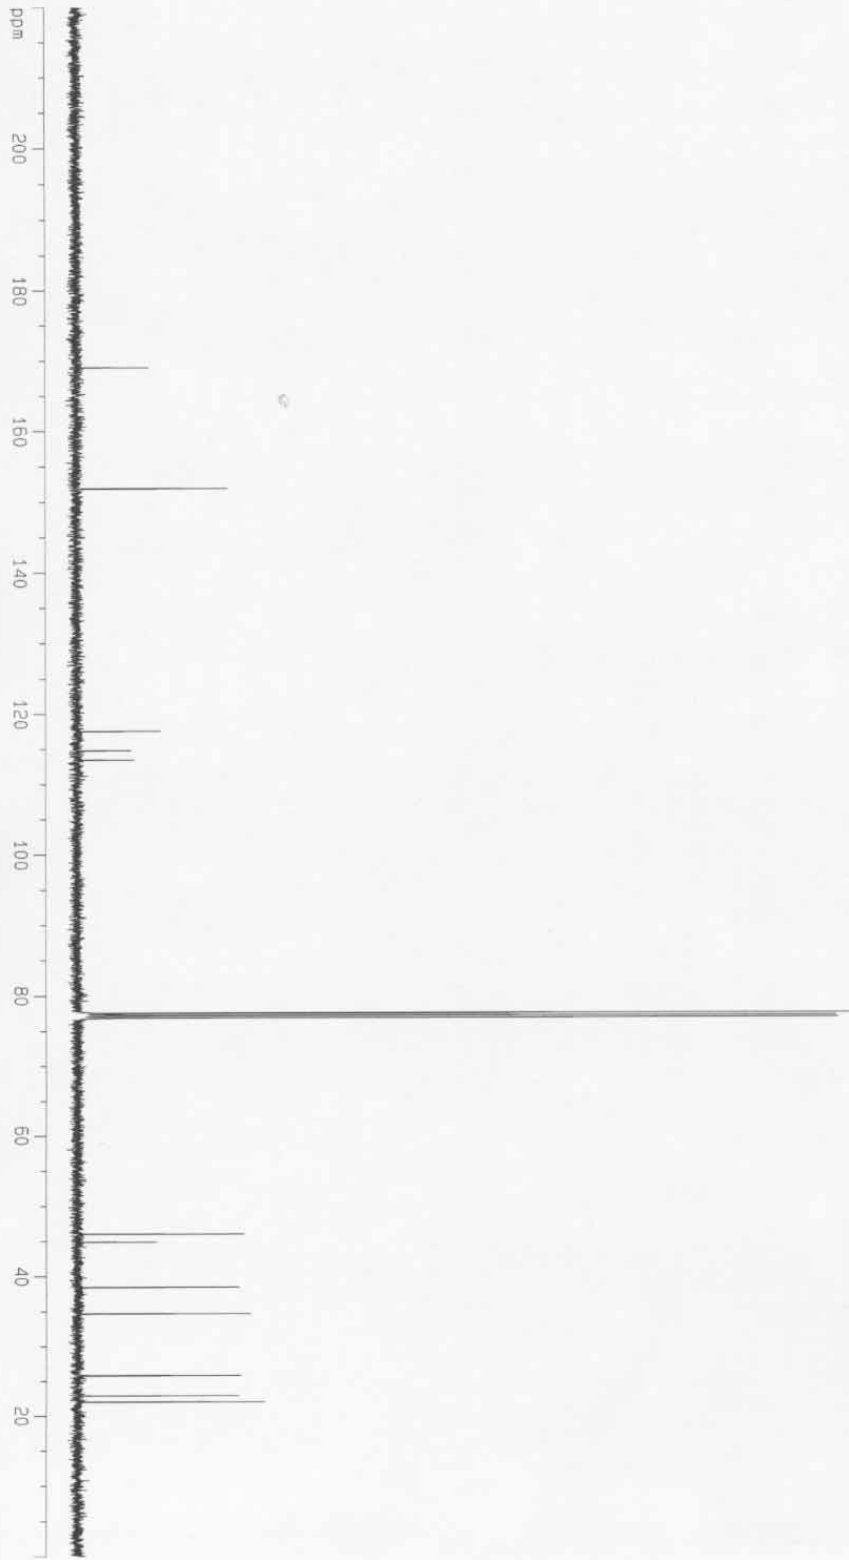

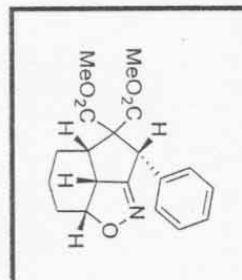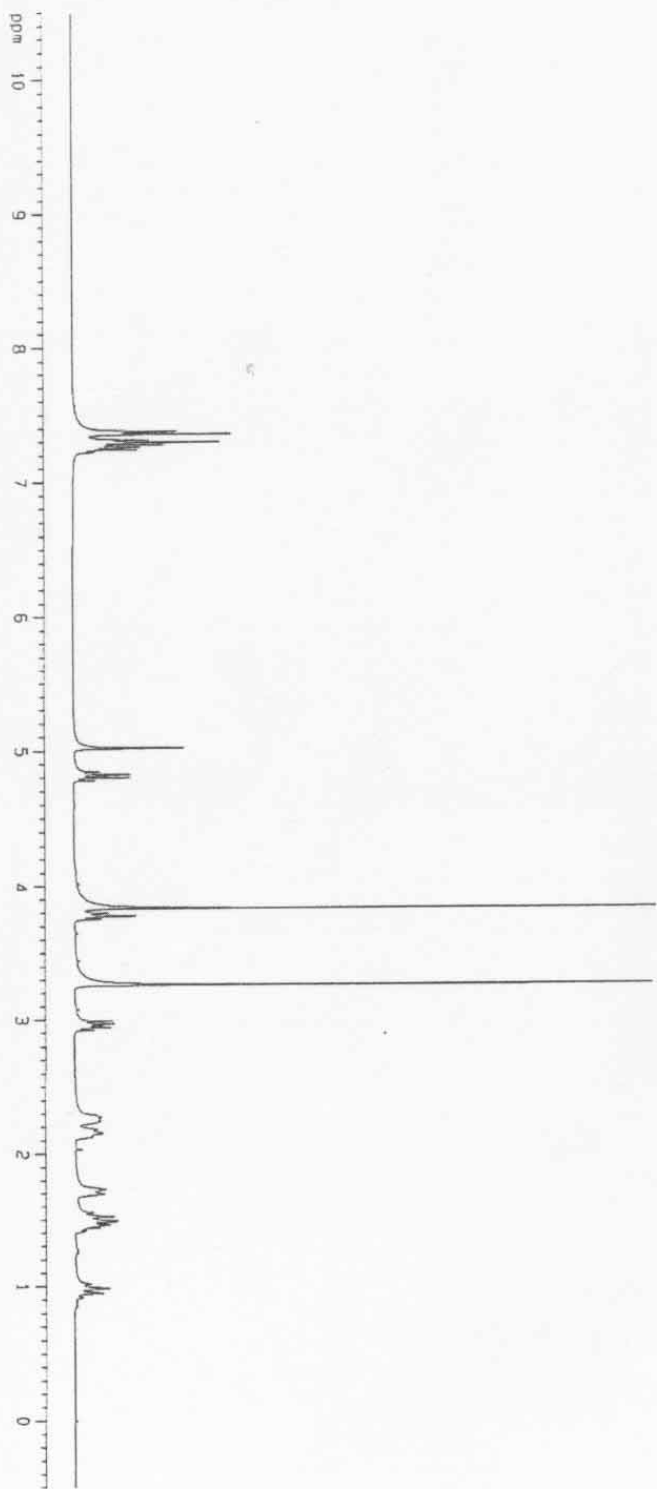

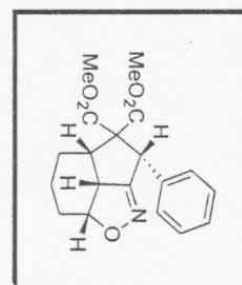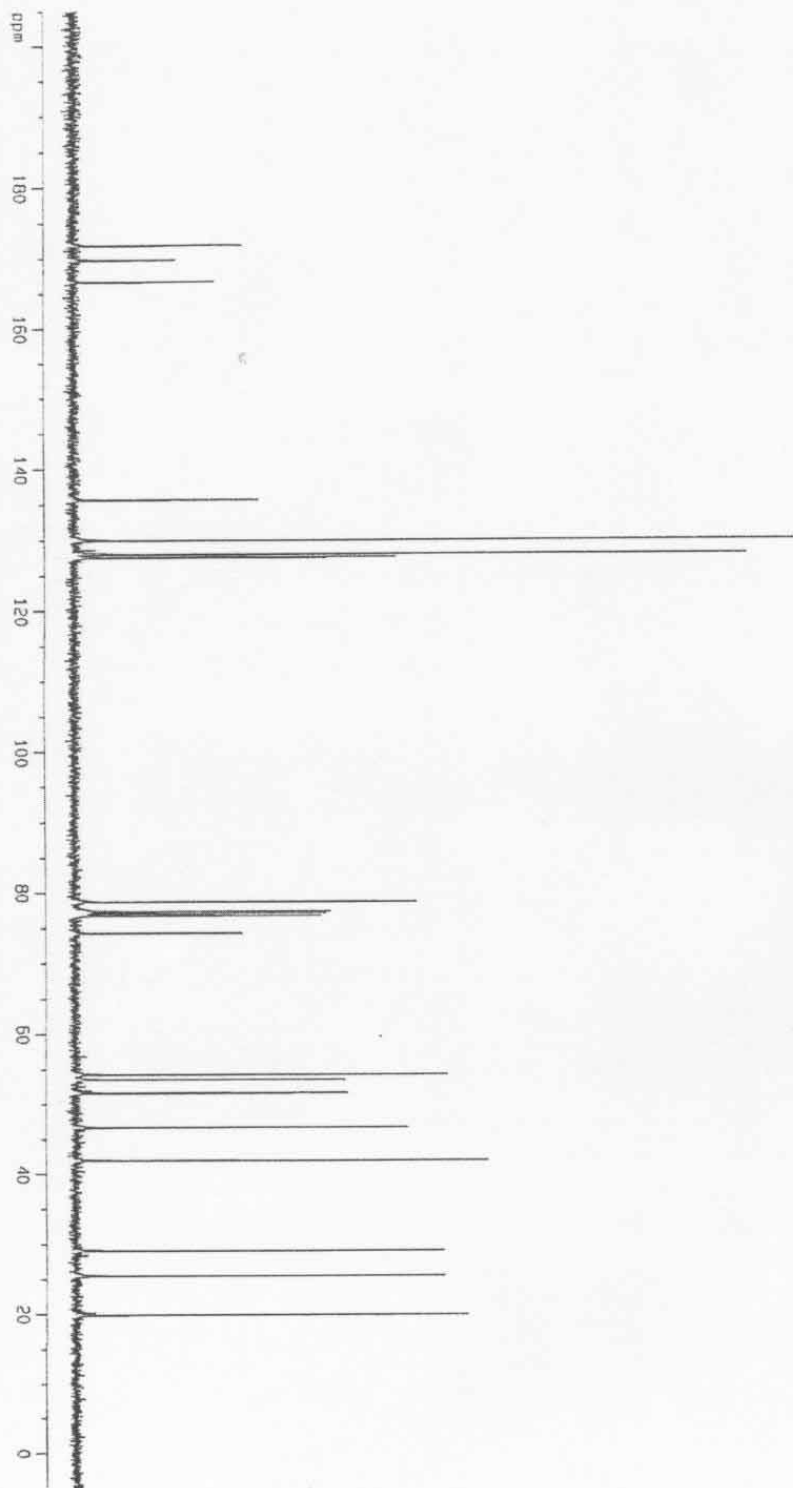

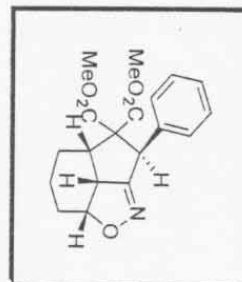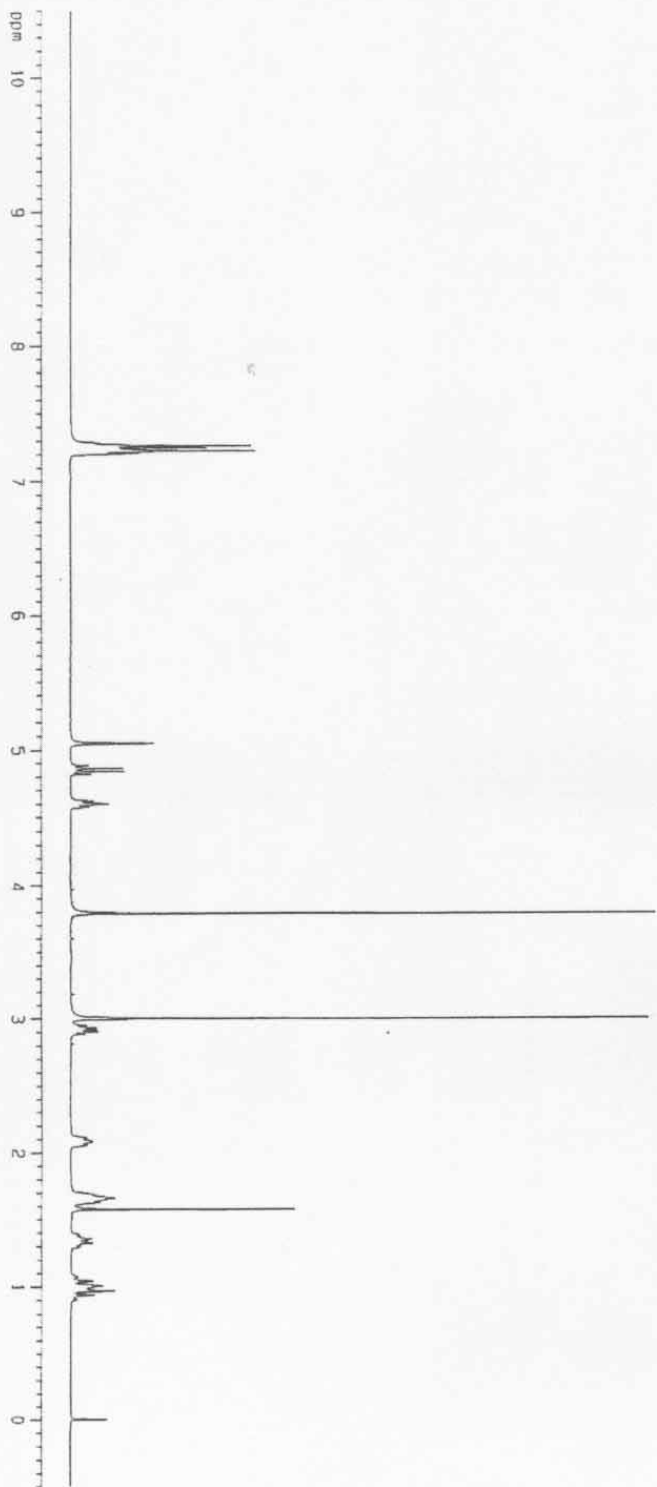

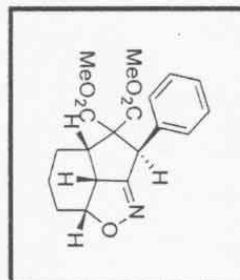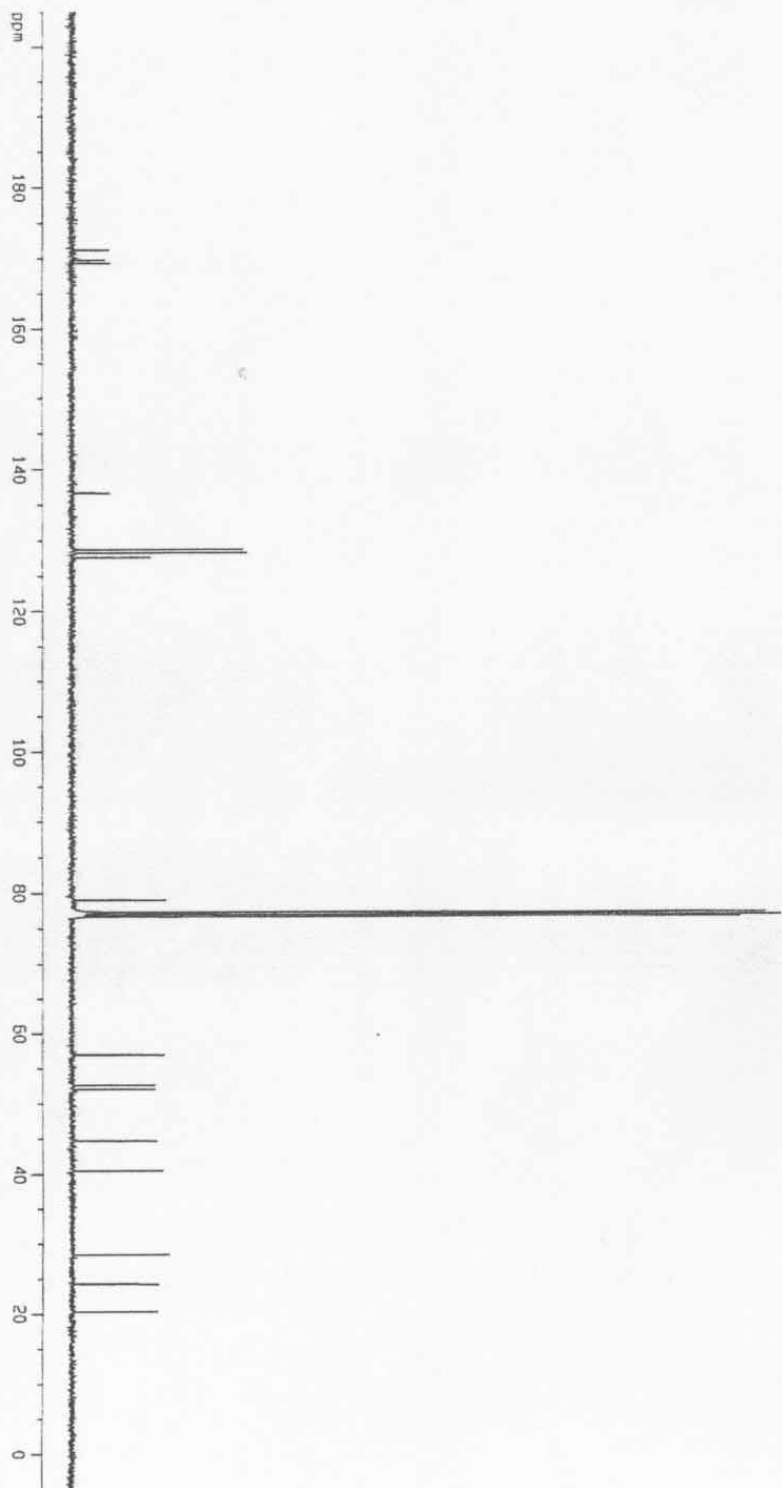

Supplement: b606717d-3.pdf [file b606717d-3.pdf]
